# Supplementary material for: A Cross-Study Transcriptional Analysis of Parkinson's Disease
Source: PLOS journal article supplement (doi:10.1371/journal.pone.0004955), 2009-03-20
Supplement: S1 (10.1371/journal.pone.0004955.s001) [file journal.pone.0004955.s001]

**Table S1. Comparison of overlap in genes between PD-related transcriptomic studies**

The following table illustrates the increase in data convergence between PD-related transcriptomic studies following the implementation of our common analysis methodology

|              | Number of genes in common        |                                              |
|--------------|----------------------------------|----------------------------------------------|
| # of Studies | From the 11 published gene lists | From the 13 gene lists after common analysis |
| 8            | 0                                | 0                                            |
| 7            | 0                                | 2                                            |
| 6            | 0                                | 20                                           |
| 5            | 0                                | 53                                           |
| 4            | 0                                | 170                                          |
| 3            | 8                                | 565                                          |
| 2            | 54                               | 1389                                         |
| 1            | 693                              | 3385                                         |
