# Supplementary material for: A Cross-Study Transcriptional Analysis of Parkinson's Disease
Source: PLOS journal article supplement (doi:10.1371/journal.pone.0004955), 2009-03-20

**Table S4. Selection of neuronal loss-associated genes**

We selected genes from the three Moran *et al.* datasets with statistically significant differences in expression between PD and controls, and subsequently remove those genes that fulfil the criteria: LSN>MSN>SFG [14]. This equates to regions where the magnitude of dopaminergic neuronal loss is likely to range from severely affected (LSN), moderately affected (MSN), to unaffected (SFG).

| LSN    | MSN    | SFG    | Neuronal loss associated gene |
|--------|--------|--------|-------------------------------|
| -4     | -2     | ND(=0) | Yes                           |
| ND(=0) | ND(=0) | -1.5   | No                            |
| ND(=0) | -2     | -0.5   | No                            |
| -4     | -2     | -1.5   | Yes                           |
| -4     | ND(=0) | -2     | No                            |
| -4     | -2     | -1.5   | Yes                           |
| -2     | -2     | ND(=0) | No                            |
| -2     | 2      | -1.5   | No                            |
| 4      | 2      | 1      | Yes                           |
| 2      | 4      | 6      | No                            |

ND= Not significantly different between PD and Controls.

Schematic of workflow for selecting neuronal loss-associated genes.

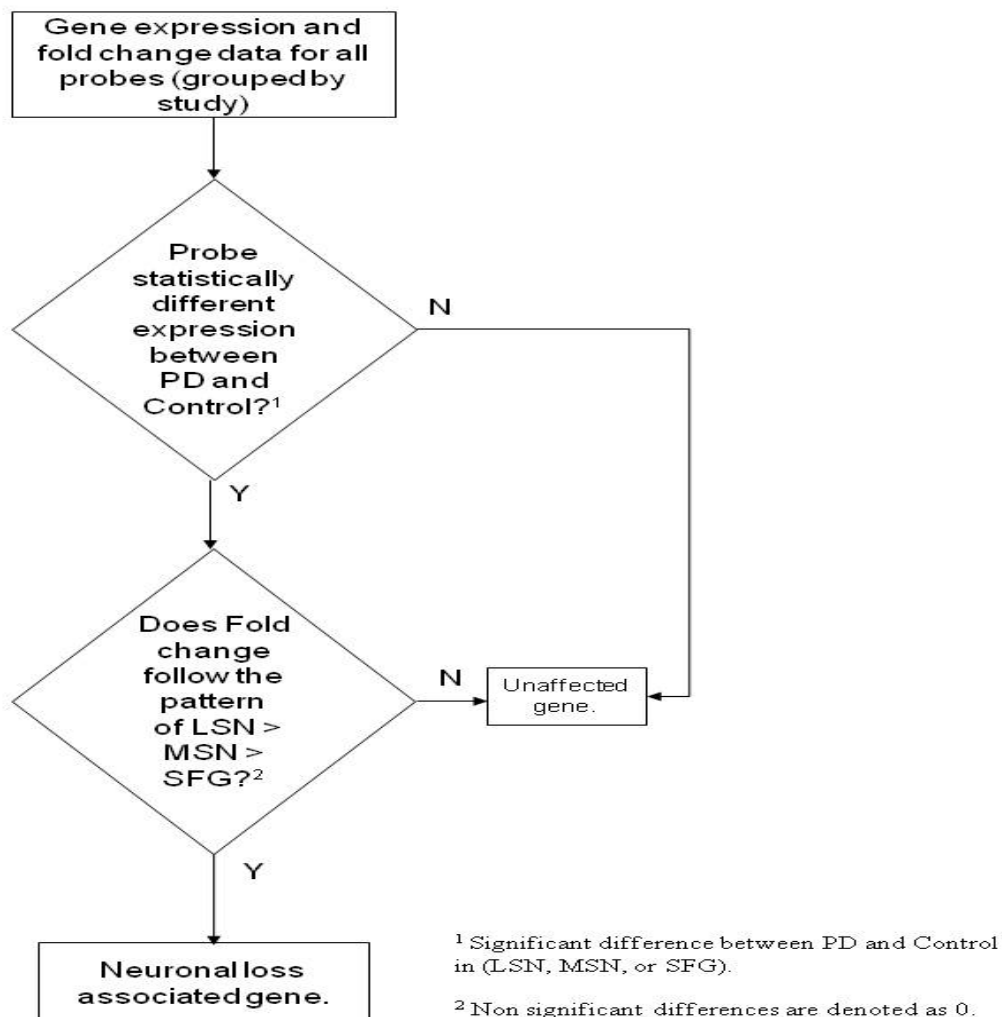

Supplement: S4 (10.1371/journal.pone.0004955.s004) [file journal.pone.0004955.s004]
