# Supplementary material for: A Cross-Study Transcriptional Analysis of Parkinson's Disease
Source: PLOS journal article supplement (doi:10.1371/journal.pone.0004955), 2009-03-20
Supplement: S7 (10.1371/journal.pone.0004955.s007) [file journal.pone.0004955.s007]

**Table S7. Fold changes in PD-related glial markers**

| Symbol                  | Gene Name <sup>#</sup>                                                        | LSN<br>Duke<br>FC* | MSN<br>Duke<br>FC* | SFG<br>Duke<br>FC* | SN<br>Hauser<br>FC* | SN<br>Zhang<br>FC* | SN<br>Lesnick<br>FC* |
|-------------------------|-------------------------------------------------------------------------------|--------------------|--------------------|--------------------|---------------------|--------------------|----------------------|
| <b>Astroglia</b>        |                                                                               | -                  | -                  | -                  | -                   | -                  | -                    |
| GFAP                    | glial fibrillary acidic protein                                               | -                  | -                  | -                  | -                   | -                  | -                    |
| S100B                   | S100 calcium binding protein B                                                | -                  | -                  | -                  | -                   | -                  | -                    |
| SLC1A3                  | solute carrier family 1 (glial high affinity glutamate transporter), member 3 | -                  | -                  | -                  | -                   | -                  | -                    |
| SLC1A2                  | solute carrier family 1 (glial high affinity glutamate transporter), member 2 | -                  | -                  | -                  | -                   | -                  | -                    |
| GLUL                    | glutamate-ammonia ligase (glutamine synthetase)                               | -                  | -                  | -                  | -                   | 1.26               | -                    |
| GDNF                    | glial cell derived neurotrophic factor                                        | -                  | -                  | -                  | -                   | -                  | 1.2                  |
| BDNF                    | brain-derived neurotrophic factor                                             | -                  | -                  | -                  | -                   | 1.26               | -                    |
| NFE2L2                  | nuclear factor (erythroid-derived 2)-like 2                                   | -                  | -                  | -                  | -                   | -                  | -                    |
| F2R                     | coagulation factor II (thrombin) receptor (PAR-1)                             | -                  | -                  | -                  | -                   | -                  | -                    |
| ARMET                   | arginine-rich, mutated in early stage tumors (MANF)                           | -                  | -                  | -                  | -                   | -                  | -                    |
| <b>Microglia</b>        |                                                                               | -                  | -                  | -                  | -                   | -                  | -                    |
| ITGAM                   | integrin, alpha M (complement component 3 receptor 3 subunit)                 | -                  | -                  | -                  | -                   | -                  | -                    |
| CD68                    | CD68 molecule                                                                 | -                  | -                  | -                  | -                   | -                  | -                    |
| CD40                    | CD40 molecule, TNF receptor superfamily member 5                              | -                  | -                  | -                  | -                   | -                  | -                    |
| CD80                    | CD80 molecule                                                                 | -                  | -                  | -                  | -                   | -                  | -                    |
| CD86                    | CD86 molecule                                                                 | -                  | -                  | -                  | -                   | -                  | -                    |
| ICAM1                   | intercellular adhesion molecule 1                                             | -                  | -                  | -                  | -                   | -                  | -                    |
| <b>Oligodendrocytes</b> |                                                                               | -                  | -                  | -                  | -                   | -                  | -                    |
| MAP4                    | microtubule-associated protein 4                                              | -                  | 1.28               | -                  | -                   | -                  | -                    |

<sup>#</sup> Markers from Orr et al., 2002 and McGeer and McGeer, 2008 [26,27]

<sup>\*</sup> FC = fold change of significantly different genes (p-value < 0.01)
