# Supplementary material for: A Cross-Study Transcriptional Analysis of Parkinson's Disease
Source: PLoS One. 2009 Mar 23;4(3):e4955. doi: 10.1371/journal.pone.0004955 (PMC2654916; doi:10.1371/journal.pone.0004955)
Supplement: Table S2 — The differentially expressed probes generated by common analysis for each study. Ranked probe lists for each study generated by common analysis method with fold change and p-value. (1.08 MB XLS) [file pone.0004955.s002.xls]

## Sheet: Sheet1
Table S2 The differentially expressed probes generated by common analysis for each study.
The differentially expressed probes in the SN of PD patients compared to controls in the Hauser study
Affymetrix Probe ID	Fold change	P-value
217795_s_at	1.25	0.00998
205201_at	1.19	0.00998
206356_s_at	-1.21	0.00991
212332_at	1.17	0.00989
216468_s_at	1.07	0.00988
210879_s_at	-1.26	0.00987
203221_at	1.26	0.00979
204804_at	1.15	0.00978
211138_s_at	1.21	0.00972
219522_at	-1.26	0.00957
201618_x_at	-1.23	0.00954
200622_x_at	-1.53	0.00952
215236_s_at	1.44	0.00945
213714_at	-1.31	0.00943
213832_at	-1.9	0.00933
214305_s_at	1.23	0.00921
203623_at	-1.15	0.00917
218019_s_at	-1.44	0.00908
222005_s_at	-2.28	0.00903
218208_at	-1.37	0.00891
217143_s_at	-1.1	0.0089
219169_s_at	-1.12	0.00867
91580_at	-1.07	0.00863
216092_s_at	-1.19	0.00858
208755_x_at	1.18	0.00854
200982_s_at	-1.76	0.00854
211058_x_at	-1.47	0.00853
209911_x_at	1.44	0.00846
205557_at	-1.08	0.00845
218547_at	-1.37	0.00842
212604_at	-1.13	0.00836
203947_at	-1.31	0.00832
200708_at	-1.27	0.00828
209286_at	1.11	0.00824
206452_x_at	-1.27	0.00822
219033_at	1.12	0.0082
213266_at	-1.29	0.00816
217841_s_at	-1.24	0.00813
221679_s_at	1.25	0.00802
218018_at	-1.27	0.00792
221920_s_at	1.21	0.00776
211986_at	1.77	0.00748
216903_s_at	-1.23	0.00744
203656_at	-1.23	0.00743
201473_at	1.44	0.00741
205852_at	-1.4	0.00734
221614_s_at	-1.11	0.00726
219983_at	-1.15	0.00723
200593_s_at	1.3	0.00703
208677_s_at	1.7	0.00699
209209_s_at	1.41	0.00695
214347_s_at	-1.18	0.00685
214906_x_at	1.19	0.00682
213895_at	1.1	0.00678
214543_x_at	1.31	0.00677
218807_at	-1.3	0.00676
206807_s_at	1.13	0.00671
221976_s_at	-1.11	0.00669
208120_x_at	1.23	0.00665
220599_s_at	1.17	0.00662
219660_s_at	-1.2	0.00656
212674_s_at	-1.24	0.00635
208627_s_at	1.39	0.00618
210547_x_at	-1.24	0.00616
211060_x_at	-1.26	0.00615
65588_at	-1.23	0.00614
206117_at	1.22	0.00609
33760_at	-1.09	0.00607
219745_at	-1.14	0.00605
211700_s_at	-1.36	0.00601
221554_at	-1.22	0.0059
204175_at	-1.34	0.00585
213533_at	-1.78	0.0058
45714_at	-1.26	0.00577
201008_s_at	1.89	0.00577
205390_s_at	-1.35	0.00576
213280_at	-1.36	0.00572
201509_at	-1.24	0.00566
202095_s_at	-1.07	0.00564
200799_at	2.87	0.00552
202581_at	2.94	0.00547
218548_x_at	-1.19	0.00542
204610_s_at	-1.31	0.00541
214112_s_at	-1.27	0.00536
200664_s_at	2.54	0.00536
205323_s_at	1.12	0.00532
204007_at	1.67	0.00529
208371_s_at	1.14	0.00528
218667_at	-1.23	0.00503
212177_at	1.14	0.00502
200988_s_at	-1.24	0.00497
216942_s_at	1.09	0.00489
204173_at	-1.33	0.00486
202159_at	-1.18	0.00474
205899_at	-1.18	0.00473
217979_at	-1.71	0.00472
216803_at	1.07	0.00469
201220_x_at	1.26	0.00464
212391_x_at	1.17	0.00461
202737_s_at	-1.33	0.00455
52837_at	-1.46	0.00454
214831_at	1.22	0.00435
208002_s_at	-2.28	0.00435
208837_at	-1.26	0.00434
200954_at	-1.41	0.00399
221515_s_at	-1.36	0.00395
215011_at	1.13	0.00393
211382_s_at	-1.28	0.00393
210386_s_at	-1.19	0.00375
201753_s_at	1.89	0.00369
203313_s_at	1.37	0.00365
204303_s_at	-1.46	0.00365
204945_at	-1.29	0.00352
203196_at	1.11	0.0035
210448_s_at	-1.18	0.00348
212127_at	-1.18	0.00347
216236_s_at	1.81	0.00343
213609_s_at	-1.45	0.00342
209874_x_at	-1.18	0.00337
219646_at	-1.29	0.0032
220577_at	1.12	0.00318
212894_at	-1.22	0.00301
221853_s_at	-1.32	0.00299
201707_at	-1.29	0.00295
216963_s_at	-2.01	0.00292
204726_at	-1.19	0.00291
200920_s_at	1.63	0.00283
37226_at	-1.09	0.00268
202340_x_at	1.26	0.00267
214717_at	-1.29	0.00251
217755_at	-1.38	0.0025
201009_s_at	1.56	0.00244
200722_s_at	1.25	0.0023
216852_x_at	-1.14	0.00192
211742_s_at	1.24	0.0018
212196_at	1.5	0.00172
217948_at	-1.15	0.00171
212383_at	-1.33	0.00158
210554_s_at	1.3	0.00158
203769_s_at	-1.49	0.0015
209189_at	2.08	0.0014
207501_s_at	-1.33	0.00139
215690_x_at	-1.28	0.00137
209345_s_at	-1.32	0.00137
213439_x_at	-1.34	0.00133
32502_at	-1.14	0.00129
211658_at	-1.32	0.00112
204265_s_at	1.28	0.00102
211043_s_at	-1.47	0.000957
208291_s_at	-6.45	0.000941
217770_at	-1.32	0.000927
206836_at	-6.37	0.000721
200800_s_at	3.52	0.000564
210445_at	-1.57	0.000527
221273_s_at	-1.35	0.000352
202178_at	-1.33	0.000327
219073_s_at	-1.29	0.000255
215407_s_at	-1.36	0.000177
206917_at	1.15	5.58e-05
The differentially expressed probes in the SN of PD patients compared to controls in the Zhang study
Affymetrix Probe ID	Fold change	P-value
216086_at	-4.93	0.000107
205857_at	-4.08	0.000267
204337_at	-3.88	9.51e-05
206836_at	-3.79	0.000384
214230_at	-3.44	0.000741
202508_s_at	-3.29	0.00391
221916_at	-3.22	0.00229
33767_at	-3.14	0.00841
203999_at	-3.09	0.00449
205110_s_at	-3.06	0.00141
202395_at	-3.04	0.00238
219895_at	-3.04	0.00188
204364_s_at	-2.97	0.000272
212224_at	-2.9	0.00439
210454_s_at	-2.83	0.000114
203282_at	-2.83	0.000104
203797_at	-2.78	0.00437
205311_at	-2.75	0.000749
219572_at	-2.69	0.000274
205113_at	-2.65	0.0095
205551_at	-2.63	0.000133
200978_at	-2.62	0.00415
221801_x_at	-2.6	0.000324
209990_s_at	-2.57	0.00429
205632_s_at	-2.54	0.000993
211421_s_at	-2.53	0.00124
205257_s_at	-2.5	0.00165
202854_at	-2.46	0.00358
206935_at	-2.44	0.00216
219603_s_at	-2.44	0.000488
221727_at	-2.42	0.00156
200638_s_at	-2.4	0.00274
204260_at	-2.39	0.00431
206857_s_at	-2.39	0.00349
218404_at	-2.38	0.000286
213832_at	-2.36	4.14e-06
213872_at	-2.34	0.00985
208291_s_at	-2.28	0.00972
212624_s_at	-2.27	0.00022
213913_s_at	-2.25	0.000375
205399_at	-2.23	0.000331
200737_at	-2.18	0.00645
213938_at	-2.17	0.00127
219368_at	-2.16	0.00711
219425_at	-2.16	0.00292
203798_s_at	-2.16	0.000313
204675_at	-2.14	0.000698
212508_at	-2.13	0.00357
212242_at	-2.12	0.00455
213131_at	-2.11	0.00161
213967_at	-2.11	0.000357
205357_s_at	-2.1	0.00399
209560_s_at	-2.1	0.00134
221509_at	-2.1	0.000309
214257_s_at	-2.09	0.00996
207010_at	-2.09	0.00538
201972_at	-2.09	0.00173
211071_s_at	-2.08	0.00488
219093_at	-2.08	0.00047
201658_at	-2.06	2.9e-06
208899_x_at	-2.05	0.00541
209569_x_at	-2.05	0.00129
204141_at	-2.04	0.00608
213486_at	-2.04	0.00262
204365_s_at	-2.04	0.00153
203538_at	-2.04	2.7e-05
219338_s_at	-2.03	4.17e-05
203498_at	-2.02	0.00779
215171_s_at	-2.02	0.00275
203039_s_at	-2.02	0.000202
218042_at	-2	0.00433
202641_at	-2	0.00208
203303_at	-2	0.0012
204424_s_at	-2	0.00113
213927_at	-1.99	0.00526
202279_at	-1.99	0.0013
201133_s_at	-1.98	0.00678
218332_at	-1.98	0.00431
213808_at	-1.98	0.00225
218807_at	-1.98	0.000152
204412_s_at	-1.97	0.00261
205751_at	-1.96	0.00533
217979_at	-1.95	0.00691
212956_at	-1.95	0.00655
209469_at	-1.95	0.00641
218671_s_at	-1.95	0.0047
212751_at	-1.95	0.00414
204793_at	-1.95	0.00264
209248_at	-1.93	0.00776
213357_at	-1.93	0.00173
203389_at	-1.93	0.00109
205202_at	-1.92	0.00861
208898_at	-1.92	0.0064
203817_at	-1.91	0.00751
209014_at	-1.91	0.00165
203413_at	-1.91	0.00156
214352_s_at	-1.9	0.00997
212987_at	-1.9	0.00992
207508_at	-1.9	0.00424
203680_at	-1.9	0.00308
212653_s_at	-1.9	0.00277
213009_s_at	-1.88	0.00892
215695_s_at	-1.88	0.00856
201501_s_at	-1.88	0.00568
203339_at	-1.87	0.00757
204743_at	-1.87	0.00595
222230_s_at	-1.87	0.00376
221532_s_at	-1.86	0.00725
218623_at	-1.86	0.0059
202043_s_at	-1.86	0.00269
203476_at	-1.86	0.00143
215014_at	-1.86	0.000493
205414_s_at	-1.86	0.000155
213366_x_at	-1.85	0.0065
209755_at	-1.85	0.00401
218109_s_at	-1.85	0.00156
208850_s_at	-1.85	0.00146
201310_s_at	-1.83	0.00287
218079_s_at	-1.82	0.00726
208869_s_at	-1.82	0.000225
203218_at	-1.81	0.00878
202170_s_at	-1.81	0.00784
213849_s_at	-1.81	0.00281
204467_s_at	-1.81	0.00149
213280_at	-1.81	0.000875
213924_at	-1.81	0.000754
208051_s_at	-1.8	0.00573
220359_s_at	-1.8	0.00215
212158_at	-1.8	0.00141
207981_s_at	-1.79	0.0095
201849_at	-1.79	0.00487
206404_at	-1.78	0.00752
222005_s_at	-1.78	0.00747
203414_at	-1.78	0.00177
202507_s_at	-1.77	0.0081
203182_s_at	-1.77	0.00684
219013_at	-1.77	0.0021
212600_s_at	-1.76	0.0065
218160_at	-1.76	0.0059
204604_at	-1.76	0.00012
201322_at	-1.75	0.00596
203998_s_at	-1.75	0.00425
211727_s_at	-1.75	0.00381
218788_s_at	-1.75	0.000913
202298_at	-1.74	0.00919
203478_at	-1.74	0.00598
209683_at	-1.74	0.00018
211458_s_at	-1.74	0.000109
217717_s_at	-1.73	0.00892
200697_at	-1.73	0.00109
202539_s_at	-1.72	0.00958
202001_s_at	-1.72	0.0034
218137_s_at	-1.72	0.00273
211679_x_at	-1.71	0.00636
218027_at	-1.71	0.00491
208870_x_at	-1.71	0.00434
210976_s_at	-1.71	0.00255
213222_at	-1.69	0.00675
201286_at	-1.69	0.00664
208881_x_at	-1.69	0.00359
219557_s_at	-1.68	0.00558
204521_at	-1.68	0.0011
206790_s_at	-1.67	0.00542
205872_x_at	-1.67	0.00532
201433_s_at	-1.67	0.00113
209694_at	-1.66	0.00608
201237_at	-1.66	0.00566
209914_s_at	-1.66	0.00258
209841_s_at	-1.66	0.000309
218421_at	-1.65	0.00687
214874_at	-1.65	0.0068
219288_at	-1.65	0.00366
214848_at	-1.65	0.000652
200987_x_at	-1.64	0.00784
213623_at	-1.64	0.0046
219073_s_at	-1.64	0.00102
206017_at	-1.64	4.4e-06
213666_at	-1.63	0.00941
211069_s_at	-1.63	0.00598
221750_at	-1.63	0.0036
205413_at	-1.63	0.00333
200955_at	-1.63	0.00296
212372_at	-1.63	0.00293
214247_s_at	-1.63	0.00215
213902_at	-1.63	0.000974
208845_at	-1.63	0.000275
214053_at	-1.62	0.00685
204093_at	-1.62	0.00478
208805_at	-1.62	0.00258
201198_s_at	-1.62	0.00084
214104_at	-1.62	0.000618
201824_at	-1.61	0.00884
208319_s_at	-1.61	0.00529
213203_at	-1.61	0.00263
212213_x_at	-1.61	0.00172
203335_at	-1.6	0.00997
217783_s_at	-1.6	0.00888
213558_at	-1.6	0.00718
212554_at	-1.6	0.0044
218557_at	-1.6	0.00316
209840_s_at	-1.6	0.00106
211729_x_at	-1.6	1.51e-05
209853_s_at	-1.59	0.00571
209064_x_at	-1.59	0.00526
201411_s_at	-1.59	0.00422
209065_at	-1.59	0.00385
202777_at	-1.59	0.00294
202041_s_at	-1.59	0.00216
212296_at	-1.59	0.00126
206343_s_at	-1.59	0.00125
204219_s_at	-1.59	0.00121
201437_s_at	-1.58	0.00811
212961_x_at	-1.58	0.0069
219760_at	-1.58	0.00444
214005_at	-1.58	0.00229
208352_x_at	-1.58	0.00215
207087_x_at	-1.58	0.00209
205391_x_at	-1.58	0.00151
218988_at	-1.57	0.00678
200886_s_at	-1.57	0.00582
208801_at	-1.57	0.00551
215143_at	-1.57	0.00187
214930_at	-1.57	0.000198
221792_at	-1.56	0.00988
210232_at	-1.56	0.0096
214170_x_at	-1.56	0.00694
211275_s_at	-1.56	0.00413
202634_at	-1.56	0.00332
201570_at	-1.56	0.00222
218839_at	-1.56	0.00185
214112_s_at	-1.56	0.000832
221620_s_at	-1.55	0.0059
202141_s_at	-1.55	0.00363
210532_s_at	-1.55	0.00249
209001_s_at	-1.55	0.00243
214306_at	-1.55	0.00217
218568_at	-1.55	0.000805
208934_s_at	-1.55	0.000202
213496_at	-1.54	0.00672
213533_at	-1.54	0.00424
218018_at	-1.54	0.00373
219945_at	-1.54	0.00138
206197_at	-1.54	0.000131
208868_s_at	-1.54	8.45e-05
209224_s_at	-1.53	0.00966
217879_at	-1.53	0.00383
201190_s_at	-1.53	0.00145
202785_at	-1.52	0.00696
209135_at	-1.52	0.00617
216073_at	-1.52	0.00565
217822_at	-1.52	0.00439
203856_at	-1.52	0.004
202432_at	-1.52	0.00324
204685_s_at	-1.52	0.000135
206355_at	-1.51	0.00548
209440_at	-1.51	0.00499
205011_at	-1.51	0.00197
213581_at	-1.51	0.00114
209472_at	-1.5	0.00937
207174_at	-1.5	0.00394
208693_s_at	-1.5	0.00233
204246_s_at	-1.5	0.00217
202165_at	-1.5	0.0009
215088_s_at	-1.49	0.00597
204587_at	-1.49	0.00483
201415_at	-1.49	0.00263
205826_at	-1.49	0.00186
217797_at	-1.48	0.00954
44783_s_at	-1.48	0.00814
219543_at	-1.48	0.00704
208353_x_at	-1.48	0.00406
219983_at	-1.48	0.00299
209693_at	-1.48	0.000809
203773_x_at	-1.48	1.88e-05
217869_at	-1.47	0.0047
214841_at	-1.47	0.00272
202051_s_at	-1.47	0.00139
201854_s_at	-1.47	0.00109
219660_s_at	-1.47	0.000164
203667_at	-1.46	0.00954
209797_at	-1.46	0.00609
218140_x_at	-1.46	0.0053
213309_at	-1.46	0.00423
204814_at	-1.46	0.00235
219180_s_at	-1.46	0.000304
203264_s_at	-1.45	0.00467
213308_at	-1.45	0.00185
204813_at	-1.44	0.0074
204339_s_at	-1.44	0.0029
207859_s_at	-1.44	0.00167
219625_s_at	-1.43	0.0083
215303_at	-1.43	0.00456
217880_at	-1.43	0.00421
214285_at	-1.43	0.000938
212157_at	-1.43	0.000867
203744_at	-1.43	0.000586
212627_s_at	-1.42	0.00954
214998_at	-1.42	0.00778
201519_at	-1.42	0.00746
214376_at	-1.42	0.00732
214730_s_at	-1.42	0.00646
213531_s_at	-1.41	0.00994
206698_at	-1.41	0.00405
202158_s_at	-1.41	0.001
213601_at	-1.4	0.00785
218392_x_at	-1.4	0.00714
220115_s_at	-1.4	0.00699
209991_x_at	-1.4	0.00576
205796_at	-1.4	0.00166
214442_s_at	-1.4	0.000597
212510_at	-1.39	0.00762
218642_s_at	-1.39	0.00675
211373_s_at	-1.39	0.00479
213427_at	-1.39	0.0044
221605_s_at	-1.39	0.00336
205818_at	-1.39	0.0026
219718_at	-1.39	2.98e-06
210028_s_at	-1.38	0.00671
217963_s_at	-1.38	0.00259
218341_at	-1.38	0.00209
213480_at	-1.38	0.00202
203225_s_at	-1.38	0.00193
34726_at	-1.38	0.00176
204755_x_at	-1.38	0.000371
203257_s_at	-1.37	0.00823
219714_s_at	-1.37	0.005
214260_at	-1.37	0.00464
204349_at	-1.37	0.00201
219195_at	-1.37	0.00156
220979_s_at	-1.37	0.00148
209507_at	-1.37	4.52e-05
203162_s_at	-1.36	0.00485
219263_at	-1.36	0.00402
207869_s_at	-1.36	0.00224
212490_at	-1.36	0.00151
57540_at	-1.36	0.000569
212593_s_at	-1.36	0.000342
211960_s_at	-1.35	0.00924
212589_at	-1.35	0.00774
203447_at	-1.35	0.00603
205747_at	-1.35	0.00404
200043_at	-1.35	0.00212
210448_s_at	-1.35	0.00159
206382_s_at	-1.35	0.000584
209018_s_at	-1.34	0.00925
219646_at	-1.34	0.00897
210638_s_at	-1.34	0.0074
207628_s_at	-1.34	0.0073
205376_at	-1.34	0.00543
204571_x_at	-1.34	0.00373
219772_s_at	-1.34	0.00231
219587_at	-1.34	0.00163
204671_s_at	-1.34	0.00157
217968_at	-1.34	0.000979
213912_at	-1.34	0.000463
219114_at	-1.34	2.65e-05
201622_at	-1.33	0.00804
200868_s_at	-1.33	0.0056
209222_s_at	-1.33	0.0048
206502_s_at	-1.33	0.00257
202810_at	-1.32	0.00594
212216_at	-1.32	0.00484
208715_at	-1.32	0.00136
206811_at	-1.32	0.00101
204753_s_at	-1.31	0.00319
212385_at	-1.31	0.00191
200928_s_at	-1.31	0.0012
215021_s_at	-1.3	0.00833
203693_s_at	-1.3	0.00793
218009_s_at	-1.3	0.00765
201609_x_at	-1.3	0.00528
202735_at	-1.3	0.00467
211207_s_at	-1.3	0.00388
213920_at	-1.3	0.00255
204488_at	-1.3	0.00161
201521_s_at	-1.3	0.00139
213379_at	-1.3	0.000227
214781_at	-1.29	0.00854
219008_at	-1.29	0.00663
212092_at	-1.29	0.00398
219670_at	-1.29	0.00385
216047_x_at	-1.29	0.00208
203345_s_at	-1.29	0.00186
200597_at	-1.29	0.00112
214744_s_at	-1.29	7.54e-05
202282_at	-1.28	0.00999
214620_x_at	-1.28	0.00938
220999_s_at	-1.28	0.00799
204716_at	-1.28	0.00484
213195_at	-1.28	0.00425
213714_at	-1.28	0.000844
202421_at	-1.27	0.00955
211894_x_at	-1.27	0.00938
213591_at	-1.27	0.00601
201067_at	-1.27	0.00542
218123_at	-1.27	0.00384
205879_x_at	-1.27	0.00296
201507_at	-1.27	0.00128
212170_at	-1.26	0.00644
201094_at	-1.26	0.00601
201765_s_at	-1.26	0.00212
222132_s_at	-1.26	0.00162
207124_s_at	-1.26	0.00104
215728_s_at	-1.26	0.000783
215664_s_at	-1.26	0.000723
205362_s_at	-1.26	0.00032
221047_s_at	-1.25	0.00255
203671_at	-1.25	0.00215
204667_at	-1.25	0.000998
201684_s_at	-1.25	0.00085
218078_s_at	-1.24	0.00916
219076_s_at	-1.24	0.00798
209313_at	-1.24	0.00713
221909_at	-1.24	0.00516
205390_s_at	-1.24	0.00459
212348_s_at	-1.24	0.00434
220201_at	-1.24	0.002
205217_at	-1.24	1.07e-05
213457_at	-1.23	0.00847
212243_at	-1.23	0.00821
213555_at	-1.23	0.00773
209530_at	-1.23	0.00462
209589_s_at	-1.23	0.0039
203273_s_at	-1.23	0.00182
215119_at	-1.23	0.00181
213995_at	-1.23	0.00116
213540_at	-1.23	0.000764
201677_at	-1.22	0.00825
37566_at	-1.22	0.0053
205416_s_at	-1.22	0.00409
221227_x_at	-1.22	0.0026
204548_at	-1.22	0.00225
219222_at	-1.22	0.000301
214589_at	-1.22	0.000197
214106_s_at	-1.21	0.00859
217925_s_at	-1.21	0.00354
206023_at	-1.21	0.0028
206587_at	-1.21	0.00243
221657_s_at	-1.21	0.00189
209541_at	-1.21	0.000779
205852_at	-1.2	0.00671
218897_at	-1.2	0.00648
218125_s_at	-1.2	0.00514
209533_s_at	-1.2	0.00331
213512_at	-1.2	0.00198
216120_s_at	-1.2	0.00197
210518_at	-1.2	0.00158
203030_s_at	-1.19	0.00549
221598_s_at	-1.19	0.0046
203785_s_at	-1.19	0.00422
205938_at	-1.19	0.00407
203017_s_at	-1.19	0.00326
216589_at	-1.19	0.000542
209931_s_at	-1.18	0.0043
219668_at	-1.18	0.00308
205830_at	-1.18	0.00211
217574_at	-1.18	0.002
218941_at	-1.18	0.00156
207195_at	-1.18	0.000813
215210_s_at	-1.18	0.000766
209714_s_at	-1.18	0.000677
206232_s_at	-1.18	0.000213
204448_s_at	-1.17	0.00902
210959_s_at	-1.17	0.00868
204245_s_at	-1.17	0.00756
217909_s_at	-1.17	0.00627
219982_s_at	-1.17	0.00601
218756_s_at	-1.17	0.00552
205298_s_at	-1.17	0.00436
210270_at	-1.17	0.00363
203589_s_at	-1.17	0.00311
212745_s_at	-1.17	0.0012
218069_at	-1.16	0.00933
210015_s_at	-1.16	0.00819
211212_s_at	-1.16	0.00777
207768_at	-1.16	0.00734
57703_at	-1.16	0.00613
209418_s_at	-1.16	0.00418
205389_s_at	-1.16	0.00328
209923_s_at	-1.16	0.00313
219443_at	-1.16	0.00214
212475_at	-1.16	0.000574
212656_at	-1.15	0.00877
220405_at	-1.15	0.00711
206550_s_at	-1.15	0.00528
208592_s_at	-1.15	0.00494
217352_at	-1.15	0.00327
219021_at	-1.15	0.00289
219420_s_at	-1.14	0.00977
218324_s_at	-1.14	0.00808
208240_s_at	-1.14	0.00657
205523_at	-1.14	0.00603
218485_s_at	-1.14	0.00558
218776_s_at	-1.14	0.00431
220231_at	-1.14	0.00338
214210_at	-1.14	0.00292
218662_s_at	-1.14	0.00211
217172_at	-1.14	0.000131
201421_s_at	-1.13	0.00917
210820_x_at	-1.13	0.00839
208032_s_at	-1.13	0.00784
215061_at	-1.13	0.00372
205329_s_at	-1.13	0.00276
205061_s_at	-1.13	0.00174
219742_at	-1.13	0.000775
201915_at	-1.12	0.00938
211577_s_at	-1.12	0.00537
205909_at	-1.12	0.00518
208945_s_at	-1.12	0.0049
201822_at	-1.12	0.00467
208065_at	-1.12	0.00226
219636_s_at	-1.12	0.00157
218453_s_at	-1.12	0.000232
212324_s_at	-1.12	8.68e-05
221715_at	-1.11	0.00928
203362_s_at	-1.11	0.00841
206447_at	-1.11	0.00629
207977_s_at	-1.11	0.00593
213536_s_at	-1.11	0.00411
215080_s_at	-1.11	0.00246
65438_at	-1.11	1.64e-05
214798_at	-1.1	0.00831
220594_at	-1.1	0.00703
210653_s_at	-1.1	0.00547
217601_at	-1.1	0.00418
209424_s_at	-1.09	0.00764
219687_at	-1.09	0.0076
221550_at	-1.09	0.0076
204347_at	-1.09	0.0051
219638_at	-1.09	0.00452
217685_at	-1.09	0.00113
221696_s_at	-1.09	0.000864
215721_at	-1.09	1.76e-05
206972_s_at	-1.08	0.00931
215410_at	-1.08	0.00862
210631_at	-1.08	0.00835
217634_at	-1.08	0.00775
220253_s_at	-1.08	0.00738
206585_at	-1.08	0.0061
204931_at	-1.08	0.00481
203078_at	-1.08	0.00334
220198_s_at	-1.08	0.00157
214528_s_at	-1.07	0.00836
207242_s_at	-1.07	0.00745
220898_at	-1.07	0.00667
203347_s_at	-1.07	0.0063
214458_at	-1.07	0.00203
210012_s_at	-1.07	0.002
220324_at	-1.07	0.00138
215988_s_at	-1.07	0.000783
87100_at	-1.07	0.000354
216193_at	-1.06	0.00811
217454_at	-1.06	0.00789
222332_at	-1.06	0.00779
217237_at	-1.06	0.00429
211272_s_at	-1.06	0.00429
211357_s_at	-1.06	0.00422
210748_at	-1.06	0.00398
217103_at	-1.06	0.00385
217557_s_at	-1.06	0.00241
207854_at	-1.06	0.00227
208599_at	-1.06	0.00197
220004_at	-1.06	0.00105
220812_s_at	-1.06	0.000854
211909_x_at	-1.05	0.00953
220649_at	-1.05	0.00622
216378_at	-1.05	0.00494
205028_at	-1.05	0.00194
205619_s_at	-1.04	0.00976
204727_at	-1.04	0.00743
210375_at	-1.04	0.00707
220786_s_at	-1.04	0.00659
213568_at	-1.04	0.006
221098_x_at	-1.04	0.00555
207781_s_at	-1.04	0.00387
217068_at	-1.04	0.00231
220837_at	-1.04	0.000459
214389_at	-1.03	0.00923
209554_at	-1.03	0.0075
205655_at	-1.03	0.00472
215220_s_at	-1.03	0.00355
216228_s_at	-1.03	0.00302
210771_at	-1.02	0.00567
216657_at	1.06	0.00591
215185_at	1.06	0.00225
204740_at	1.07	0.00128
208305_at	1.07	7.94e-05
206331_at	1.08	0.00969
206943_at	1.08	0.00571
207470_at	1.08	0.000892
211687_x_at	1.09	0.00597
219544_at	1.09	0.0043
215883_at	1.1	0.00982
215326_at	1.1	0.00805
220899_at	1.1	0.00612
222208_s_at	1.1	0.00428
210439_at	1.1	0.00267
215825_at	1.1	0.000689
207064_s_at	1.11	0.00975
213594_x_at	1.11	0.00916
206608_s_at	1.11	0.00829
37943_at	1.11	0.00731
40149_at	1.11	0.00479
216161_at	1.11	0.0047
203383_s_at	1.11	0.00452
61297_at	1.11	0.00438
204562_at	1.11	0.00369
213008_at	1.11	0.00287
207287_at	1.12	0.00958
219239_s_at	1.12	0.00925
213003_s_at	1.12	0.0025
215375_x_at	1.13	0.00942
203308_x_at	1.13	0.00858
219645_at	1.13	0.0085
39402_at	1.13	0.0068
203388_at	1.13	0.00531
37965_at	1.13	0.00352
207146_at	1.13	0.00326
214415_at	1.13	0.00301
35617_at	1.13	0.00225
38766_at	1.13	0.00113
207265_s_at	1.13	0.00101
219921_s_at	1.13	0.00067
217629_at	1.13	0.000588
209342_s_at	1.13	4.56e-05
218581_at	1.14	0.00979
211537_x_at	1.14	0.00915
213281_at	1.14	0.00638
212786_at	1.14	0.00586
35201_at	1.14	0.00549
220350_at	1.14	0.00413
219682_s_at	1.14	0.00344
212004_at	1.14	0.00199
44146_at	1.14	0.00157
217297_s_at	1.14	0.00108
207691_x_at	1.14	0.00104
209124_at	1.15	0.00941
208371_s_at	1.15	0.00919
208459_s_at	1.15	0.00912
37022_at	1.15	0.00896
215683_at	1.15	0.0088
210598_at	1.15	0.00876
206487_at	1.15	0.00621
219884_at	1.15	0.00592
215612_at	1.15	0.00505
210311_at	1.15	0.00497
209282_at	1.15	0.0038
215398_at	1.15	0.00332
211661_x_at	1.15	0.0011
213654_at	1.15	0.00103
222143_s_at	1.15	0.000956
215234_at	1.15	0.000658
51774_s_at	1.16	0.00987
207233_s_at	1.16	0.00924
204327_s_at	1.16	0.00841
211138_s_at	1.16	0.00781
208259_x_at	1.16	0.00656
215054_at	1.16	0.00652
215162_at	1.16	0.00632
221164_x_at	1.16	0.00457
203047_at	1.16	0.00444
44563_at	1.16	0.00385
214369_s_at	1.16	0.00352
216459_x_at	1.16	0.00198
38269_at	1.16	0.00181
207749_s_at	1.16	0.00139
213401_s_at	1.16	0.00113
218169_at	1.16	0.00032
203118_at	1.16	0.000248
40020_at	1.17	0.00819
208050_s_at	1.17	0.00734
211130_x_at	1.17	0.00548
1294_at	1.17	0.0045
219865_at	1.17	0.00328
219618_at	1.17	0.00312
212625_at	1.17	0.00106
48612_at	1.17	0.00103
202715_at	1.17	0.000984
209427_at	1.17	0.00087
204198_s_at	1.17	0.000176
221223_x_at	1.18	0.00979
220108_at	1.18	0.00947
212717_at	1.18	0.00882
211497_x_at	1.18	0.00846
219722_s_at	1.18	0.00584
33197_at	1.18	0.00388
203412_at	1.18	0.00334
206216_at	1.18	0.00278
211266_s_at	1.18	0.00278
215873_x_at	1.18	0.00261
210761_s_at	1.18	0.00212
36829_at	1.18	0.00194
204139_x_at	1.18	0.00113
222327_x_at	1.18	0.000764
209239_at	1.18	0.000315
214755_at	1.18	5.11e-05
210889_s_at	1.19	0.00835
37408_at	1.19	0.0079
201026_at	1.19	0.00777
218051_s_at	1.19	0.00561
215283_at	1.19	0.00529
204038_s_at	1.19	0.0049
218335_x_at	1.19	0.00381
48580_at	1.19	0.00311
210389_x_at	1.19	0.00289
215334_at	1.19	0.00227
205858_at	1.19	0.00225
212369_at	1.19	0.00184
38521_at	1.19	0.0012
210197_at	1.19	0.000517
204197_s_at	1.19	0.000416
214298_x_at	1.19	4.27e-05
210915_x_at	1.2	0.00724
41387_r_at	1.2	0.00668
221895_at	1.2	0.00569
218950_at	1.2	0.00478
218466_at	1.2	0.00276
218639_s_at	1.2	0.00244
203524_s_at	1.2	0.00218
213815_x_at	1.2	0.00206
45687_at	1.2	0.00161
202384_s_at	1.21	0.00781
209545_s_at	1.21	0.00711
218937_at	1.21	0.00702
55583_at	1.21	0.00601
213462_at	1.21	0.00581
207713_s_at	1.21	0.00419
222372_at	1.21	0.0039
210336_x_at	1.21	0.00281
214070_s_at	1.21	0.00208
207395_at	1.21	0.000765
214057_at	1.21	0.000505
220750_s_at	1.21	0.000472
220730_at	1.21	1.5e-05
212970_at	1.22	0.0095
221489_s_at	1.22	0.00946
219745_at	1.22	0.00799
215821_x_at	1.22	0.00766
213527_s_at	1.22	0.00703
212945_s_at	1.22	0.00687
217342_x_at	1.22	0.00511
203206_at	1.22	0.00471
209121_x_at	1.22	0.00423
205019_s_at	1.22	0.003
201715_s_at	1.22	0.00118
219091_s_at	1.22	0.00108
203648_at	1.22	0.00055
211348_s_at	1.23	0.00974
202861_at	1.23	0.00578
204669_s_at	1.23	0.00522
222236_s_at	1.23	0.00489
220605_s_at	1.23	0.00468
220954_s_at	1.23	0.00436
213685_at	1.23	0.0042
208992_s_at	1.23	0.00365
211366_x_at	1.23	0.00294
200747_s_at	1.23	0.0027
212346_s_at	1.23	0.0019
78495_at	1.23	0.00126
35685_at	1.23	0.000502
204275_at	1.23	6.18e-05
218337_at	1.24	0.00869
203379_at	1.24	0.00758
214791_at	1.24	0.00229
215887_at	1.24	0.00164
212356_at	1.24	0.000981
208807_s_at	1.24	0.000862
209919_x_at	1.25	0.0098
206090_s_at	1.25	0.00878
206056_x_at	1.25	0.00628
203761_at	1.25	0.00549
210958_s_at	1.25	0.00361
205998_x_at	1.25	0.00257
221640_s_at	1.25	0.00201
220975_s_at	1.25	0.00197
207727_s_at	1.25	0.00155
202925_s_at	1.25	0.00113
37278_at	1.25	0.000503
203065_s_at	1.26	0.0096
212019_at	1.26	0.00545
201104_x_at	1.26	0.00471
202068_s_at	1.26	0.0042
212516_at	1.26	0.00338
206119_at	1.26	0.00276
218665_at	1.26	0.00269
219801_at	1.26	0.00223
51192_at	1.26	0.0014
201015_s_at	1.26	0.0011
215001_s_at	1.26	0.00104
218587_s_at	1.26	0.000446
215603_x_at	1.27	0.00961
210208_x_at	1.27	0.00766
216333_x_at	1.27	0.0073
218274_s_at	1.27	0.00695
212796_s_at	1.27	0.00447
212596_s_at	1.27	0.00447
204978_at	1.27	0.00421
215812_s_at	1.27	0.00399
205192_at	1.27	0.00336
219735_s_at	1.27	0.00242
219126_at	1.27	0.00207
211432_s_at	1.27	0.000309
214780_s_at	1.27	0.000179
214643_x_at	1.28	0.00889
202155_s_at	1.28	0.00875
215557_at	1.28	0.00799
221575_at	1.28	0.00737
204433_s_at	1.28	0.00656
214808_at	1.28	0.00595
60471_at	1.28	0.00476
219241_x_at	1.28	0.000666
222199_s_at	1.28	0.000141
34206_at	1.28	1.73e-05
200827_at	1.29	0.00819
216264_s_at	1.29	0.00811
213502_x_at	1.29	0.00602
213383_at	1.29	0.00531
222240_s_at	1.29	0.00361
201331_s_at	1.29	0.00333
214273_x_at	1.29	0.00252
213205_s_at	1.29	0.000932
209439_s_at	1.29	0.000855
212680_x_at	1.3	0.00851
217164_at	1.3	0.00705
218058_at	1.3	0.00409
211919_s_at	1.3	0.00279
220221_at	1.3	0.00256
203576_at	1.3	0.00231
203514_at	1.3	0.000283
212691_at	1.3	1.8e-06
209834_at	1.31	0.00953
206377_at	1.31	0.00718
213451_x_at	1.31	0.00393
219235_s_at	1.31	0.00345
203718_at	1.31	0.00333
220408_x_at	1.31	0.00222
221725_at	1.32	0.00893
215191_at	1.32	0.00799
221558_s_at	1.32	0.00699
209110_s_at	1.32	0.00688
58994_at	1.32	0.00663
203668_at	1.32	0.0063
213700_s_at	1.32	0.00122
32094_at	1.32	0.000164
204470_at	1.33	0.00954
201639_s_at	1.33	0.0088
214427_at	1.33	0.00808
211926_s_at	1.33	0.00435
206567_s_at	1.33	0.000509
205911_at	1.33	0.000246
219379_x_at	1.33	0.000246
37462_i_at	1.33	0.000223
201908_at	1.34	0.00994
220575_at	1.34	0.00977
211417_x_at	1.34	0.00967
218084_x_at	1.34	0.00784
215754_at	1.34	0.00659
90265_at	1.34	0.00474
214739_at	1.34	0.00315
200990_at	1.34	0.00264
205546_s_at	1.34	0.000551
218064_s_at	1.34	0.000309
38487_at	1.34	8.54e-05
213334_x_at	1.35	0.00975
203556_at	1.35	0.00847
40687_at	1.35	0.00257
218425_at	1.35	0.000814
208438_s_at	1.35	0.000404
201613_s_at	1.36	0.00886
203364_s_at	1.36	0.00829
216110_x_at	1.36	0.00702
213046_at	1.36	0.00341
217866_at	1.36	0.0034
221774_x_at	1.36	0.000651
212359_s_at	1.36	2.32e-05
207760_s_at	1.37	0.00614
210740_s_at	1.37	0.00327
209350_s_at	1.37	0.00245
212968_at	1.37	0.000549
45526_g_at	1.37	0.000514
37996_s_at	1.37	0.000252
40837_at	1.37	0.000231
213876_x_at	1.37	0.000175
213843_x_at	1.37	0.000138
203921_at	1.38	0.00442
212858_at	1.38	0.00413
204158_s_at	1.38	0.002
37152_at	1.38	0.00197
206001_at	1.39	0.00789
203859_s_at	1.39	0.00511
218144_s_at	1.39	0.00425
202723_s_at	1.39	0.00285
214096_s_at	1.39	0.00122
208174_x_at	1.39	0.000459
210854_x_at	1.39	2.03e-05
210580_x_at	1.4	0.00674
219521_at	1.4	0.0064
212726_at	1.4	0.0057
210249_s_at	1.4	0.00415
209435_s_at	1.4	0.0027
211600_at	1.4	0.000496
204640_s_at	1.41	0.00826
208922_s_at	1.41	0.0028
220661_s_at	1.41	0.000689
203546_at	1.41	0.00066
201904_s_at	1.41	0.000589
200931_s_at	1.42	0.00623
211316_x_at	1.42	0.0054
208892_s_at	1.42	0.00365
212437_at	1.43	0.0075
218714_at	1.43	0.00283
213752_at	1.43	0.000152
1007_s_at	1.43	8.78e-05
211160_x_at	1.44	0.00942
209107_x_at	1.44	0.00708
202771_at	1.44	0.007
210649_s_at	1.45	0.00968
207435_s_at	1.45	0.00523
210051_at	1.45	0.0017
204328_at	1.45	4.4e-05
201997_s_at	1.46	0.00793
210719_s_at	1.46	0.00388
212890_at	1.46	0.0011
200630_x_at	1.46	0.000504
212152_x_at	1.47	0.000841
201783_s_at	1.47	0.000289
204150_at	1.47	0.000107
38671_at	1.47	8.7e-05
218727_at	1.47	8.62e-05
218847_at	1.48	0.00279
212494_at	1.48	0.00225
206058_at	1.48	0.00138
210231_x_at	1.48	0.000932
202332_at	1.48	0.000704
219737_s_at	1.49	0.0082
218508_at	1.49	0.000741
50221_at	1.5	0.00384
203314_at	1.5	0.00361
204248_at	1.5	0.00204
208285_at	1.51	0.00351
218678_at	1.52	0.00726
220287_at	1.52	0.00264
214052_x_at	1.53	0.00565
41644_at	1.53	8.39e-05
213050_at	1.54	0.00806
204131_s_at	1.54	0.00599
212715_s_at	1.54	0.00527
220142_at	1.55	0.00095
203652_at	1.55	0.000315
220525_s_at	1.55	0.000259
41160_at	1.55	8.77e-05
212783_at	1.56	0.00738
221267_s_at	1.56	0.00506
207169_x_at	1.56	0.00445
222258_s_at	1.56	0.00438
212080_at	1.56	0.000796
212015_x_at	1.56	0.000294
201427_s_at	1.57	0.00754
215127_s_at	1.57	0.00497
40562_at	1.57	0.00255
213236_at	1.57	0.000484
217152_at	1.58	0.00969
201967_at	1.59	0.00328
205436_s_at	1.6	0.00116
208779_x_at	1.6	0.000244
210749_x_at	1.6	6.88e-05
208637_x_at	1.61	0.00612
214035_x_at	1.61	0.000378
211271_x_at	1.61	0.000129
213721_at	1.62	0.00538
221496_s_at	1.62	0.00237
214297_at	1.62	0.00146
202423_at	1.62	0.000737
209082_s_at	1.63	0.00515
202189_x_at	1.64	0.000587
200601_at	1.64	9.04e-06
204906_at	1.65	0.00244
219922_s_at	1.65	0.00222
564_at	1.65	0.000573
211959_at	1.67	0.00847
219602_s_at	1.68	0.00823
214870_x_at	1.68	0.00155
202123_s_at	1.69	0.00763
204538_x_at	1.71	0.00156
209048_s_at	1.72	0.00094
211270_x_at	1.72	0.000819
200768_s_at	1.73	0.00533
204021_s_at	1.75	0.00618
216306_x_at	1.75	0.00309
216268_s_at	1.77	0.00894
211031_s_at	1.78	0.000354
202822_at	1.79	0.00992
214797_s_at	1.8	0.00151
219167_at	1.8	0.000737
221501_x_at	1.8	0.00053
203255_at	1.81	0.00365
221806_s_at	1.81	0.000805
209290_s_at	1.87	7.73e-05
212772_s_at	1.89	0.000318
218523_at	1.9	0.00033
219534_x_at	1.94	0.00965
209462_at	1.98	0.000526
219911_s_at	2.01	0.00364
34406_at	2.01	6.03e-06
214315_x_at	2.03	0.000473
207323_s_at	2.06	0.00729
214799_at	2.07	0.00378
212778_at	2.11	2.04e-05
212888_at	2.2	0.00746
219229_at	2.21	0.00437
205883_at	2.3	0.000209
203973_s_at	2.32	0.00169
213156_at	2.43	0.00328
213089_at	3.11	0.000816
The differentially expressed probes in the lateral SN of PD patients compared to controls in the Moran study
Affymetrix Probe ID	Fold change	P-value
117_at	1.15	0.00712
200003_s_at	1.31	0.0061
200011_s_at	-1.33	0.00396
200013_at	1.37	0.00239
200024_at	1.22	0.00931
200030_s_at	-1.37	0.00362
200046_at	1.28	0.00179
200050_at	1.43	0.0063
200081_s_at	1.43	0.000657
200089_s_at	1.27	0.00155
200090_at	1.27	0.00576
200091_s_at	1.61	7.96e-05
200092_s_at	1.48	0.000932
200632_s_at	1.65	0.000501
200659_s_at	1.42	0.00115
200697_at	-1.67	0.00104
200740_s_at	-1.76	0.00415
200746_s_at	-1.41	0.0044
200767_s_at	1.19	0.00568
200780_x_at	-1.47	0.0082
200800_s_at	3.98	0.00988
200864_s_at	-1.45	0.00274
200945_s_at	-1.53	0.00042
200946_x_at	-1.6	0.00659
200955_at	-1.58	0.00152
200981_x_at	-1.45	0.00982
201008_s_at	2.3	0.00974
201010_s_at	1.86	0.00316
201043_s_at	1.23	0.00949
201054_at	-1.38	0.00028
201066_at	-1.47	0.00842
201128_s_at	-1.72	0.00602
201168_x_at	-1.42	0.0098
201206_s_at	1.23	0.00506
201253_s_at	-1.25	0.000432
201284_s_at	-1.6	0.00104
201314_at	-1.44	0.00479
201341_at	-1.32	0.00944
201346_at	1.68	0.000893
201410_at	-1.72	0.00445
201415_at	-1.54	0.000412
201427_s_at	1.85	0.00128
201433_s_at	-1.75	0.00437
201486_at	-1.82	0.00224
201519_at	-1.45	0.00575
201540_at	-1.57	0.0052
201572_x_at	-1.38	0.00763
201576_s_at	-1.3	0.00594
201588_at	-1.29	0.00988
201591_s_at	-1.45	0.00409
201595_s_at	-1.56	0.00177
201609_x_at	-1.47	0.000312
201616_s_at	1.58	0.00237
201658_at	-1.57	0.000297
201662_s_at	-1.45	0.00348
201671_x_at	-1.3	0.000981
201707_at	-1.39	7.84e-05
201739_at	1.75	0.00494
201774_s_at	1.39	0.000427
201788_at	-1.48	0.00227
201797_s_at	-1.5	0.00151
201812_s_at	1.44	0.00155
201817_at	-1.34	0.00153
201854_s_at	-1.38	0.00237
201855_s_at	-1.69	0.000837
201875_s_at	-1.26	0.00384
201877_s_at	-1.71	0.000918
201889_at	-1.96	0.00143
201896_s_at	1.58	0.00471
201919_at	-1.23	0.00286
201955_at	-1.68	0.00591
201972_at	-1.8	0.00522
202051_s_at	-1.54	0.00109
202078_at	-1.64	0.00269
202080_s_at	-1.47	0.00104
202086_at	-1.82	0.00313
202093_s_at	1.34	0.00908
202104_s_at	-1.25	0.00877
202116_at	1.35	0.00285
202122_s_at	1.54	0.00177
202134_s_at	1.14	0.00805
202156_s_at	-1.32	0.0064
202158_s_at	-1.43	0.00302
202207_at	-1.71	0.00815
202228_s_at	-2.31	0.00399
202254_at	-1.32	0.00146
202260_s_at	-2.26	0.00899
202314_at	-1.45	0.00854
202341_s_at	1.43	0.00509
202353_s_at	-1.98	0.0053
202363_at	1.47	0.00274
202372_at	-1.33	0.00321
202391_at	-2.48	0.000798
202432_at	-1.81	0.000533
202500_at	1.46	0.00819
202509_s_at	1.2	0.00571
202539_s_at	-1.95	0.00818
202540_s_at	-1.71	9.13e-05
202573_at	-1.43	0.00815
202582_s_at	-1.56	0.000283
202583_s_at	-1.86	0.00856
202597_at	1.15	0.00307
202606_s_at	-1.65	0.00283
202614_at	-1.8	0.0021
202645_s_at	-1.27	0.00194
202671_s_at	-1.69	0.000825
202677_at	-1.32	0.000575
202679_at	1.69	0.00577
202708_s_at	1.9	0.0023
202719_s_at	1.13	0.004
202723_s_at	1.39	0.00606
202739_s_at	-1.34	0.00254
202743_at	-1.51	0.00227
202754_at	-1.47	0.000701
202767_at	-1.51	3.69e-05
202777_at	-1.91	9.05e-05
202783_at	-1.33	0.00856
202815_s_at	1.17	0.00614
202832_at	-1.71	1.04e-05
202838_at	-1.31	0.00744
202848_s_at	-1.24	0.00719
202854_at	-3.11	0.000598
202886_s_at	1.23	0.00858
202887_s_at	1.9	0.0033
202919_at	-1.4	0.00078
202956_at	-1.28	0.00183
202972_s_at	1.2	0.00399
202983_at	-1.51	0.00482
202990_at	-1.96	0.00613
203020_at	-1.97	0.00218
203029_s_at	-1.73	0.00845
203031_s_at	-1.47	0.00163
203039_s_at	-1.63	0.00474
203041_s_at	2.27	0.00704
203042_at	2.19	0.00544
203053_at	-1.55	0.00537
203065_s_at	1.51	0.0072
203067_at	-1.73	0.00412
203072_at	1.43	0.00137
203078_at	-1.18	0.000296
203089_s_at	-1.45	0.00509
203103_s_at	-1.2	0.00779
203114_at	-1.64	0.00233
203117_s_at	1.52	0.00267
203135_at	-1.12	0.00429
203139_at	-1.72	0.00596
203162_s_at	-1.37	0.00211
203179_at	-1.59	0.00315
203182_s_at	-1.72	0.00673
203194_s_at	1.22	0.00118
203204_s_at	1.28	0.00516
203206_at	1.24	0.00499
203218_at	-1.86	0.000845
203224_at	-2.2	0.000312
203245_s_at	-1.67	0.00133
203253_s_at	-1.78	0.000112
203264_s_at	-1.74	0.0074
203282_at	-4.67	0.0003
203284_s_at	-1.58	0.0031
203303_at	-1.85	0.00249
203355_s_at	-2.25	0.00123
203362_s_at	-1.16	0.00516
203404_at	-1.8	0.00936
203405_at	-1.51	0.00843
203408_s_at	-1.56	0.00968
203410_at	-1.55	0.00888
203470_s_at	1.12	0.00765
203475_at	1.13	0.00787
203476_at	-5	0.000829
203485_at	-1.85	0.00691
203498_at	-2.49	0.00444
203503_s_at	-1.31	0.00112
203524_s_at	1.23	0.00337
203525_s_at	-1.63	0.00854
203527_s_at	-1.32	0.00483
203623_at	-1.24	0.0044
203656_at	-1.4	0.00197
203675_at	-1.25	0.00835
203680_at	-3.88	0.00213
203687_at	-1.46	0.000104
203710_at	-3.03	5.94e-05
203714_s_at	-1.36	0.00243
203738_at	-1.42	0.0042
203773_x_at	-1.31	0.00933
203818_s_at	-1.27	0.00102
203826_s_at	-1.41	0.00683
203831_at	-1.16	0.00206
203843_at	-1.6	0.00165
203855_at	-1.62	0.00321
203856_at	-1.47	0.000748
203874_s_at	-1.48	0.0069
203875_at	-1.29	0.00775
203909_at	-1.81	0.00242
203911_at	-2.11	0.00251
203947_at	-1.28	0.00871
203977_at	1.26	0.00156
203979_at	1.4	0.00328
203999_at	-5.52	0.000521
204009_s_at	-1.59	0.000491
204027_s_at	-1.19	0.00843
204035_at	-6.21	0.000365
204058_at	-1.68	0.00266
204059_s_at	-1.54	0.00945
204072_s_at	-1.92	0.000112
204076_at	-1.51	0.00538
204093_at	-1.57	0.0021
204099_at	-1.54	0.0011
204119_s_at	-1.41	0.00681
204131_s_at	1.54	0.00341
204141_at	-2.38	0.000397
204159_at	1.53	0.00503
204167_at	1.23	0.00536
204190_at	1.18	0.00366
204224_s_at	-3.79	3.29e-05
204226_at	-1.47	0.00155
204256_at	-1.6	1.55e-05
204260_at	-3.44	0.0081
204335_at	1.29	0.000587
204337_at	-3.6	0.00856
204346_s_at	1.1	0.00751
204347_at	-1.26	0.00591
204364_s_at	-4.03	0.00548
204365_s_at	-2.82	0.00592
204411_at	-1.56	0.000586
204423_at	1.22	0.00655
204435_at	-1.59	0.00246
204467_s_at	-2.18	0.000134
204471_at	-4.44	0.000407
204488_at	-1.31	0.00335
204498_s_at	1.21	0.00445
204500_s_at	-1.52	0.00327
204504_s_at	1.18	0.00698
204521_at	-1.69	0.00355
204540_at	-3	0.00789
204546_at	-1.86	0.00988
204556_s_at	-1.35	0.00093
204557_s_at	-1.57	0.00347
204560_at	1.61	0.00658
204584_at	-2.73	0.00663
204591_at	-2.13	0.00365
204604_at	-2.38	0.00436
204650_s_at	-1.22	0.01
204671_s_at	-1.32	0.0011
204672_s_at	-1.22	0.00142
204719_at	2.26	0.00973
204723_at	-2.68	0.00744
204730_at	-2.71	0.000237
204744_s_at	-1.76	0.00251
204749_at	-1.78	0.00896
204764_at	1.73	0.00542
204803_s_at	1.2	0.00273
204831_at	-1.25	0.00336
204875_s_at	-1.45	0.0071
204915_s_at	-1.24	0.00257
204938_s_at	1.35	0.00547
204953_at	-2.6	0.00779
204957_at	-1.53	0.00352
204995_at	-2.28	0.00713
205005_s_at	-1.22	0.00035
205011_at	-1.49	0.000104
205030_at	-2.44	0.00232
205039_s_at	1.11	0.00769
205054_at	-1.25	0.00458
205073_at	1.43	0.00258
205104_at	-1.54	0.00203
205110_s_at	-9.26	3.24e-05
205120_s_at	1.45	0.00163
205143_at	-2.06	0.00428
205158_at	1.23	0.00077
205174_s_at	-1.51	0.00338
205193_at	1.28	0.00521
205203_at	1.3	0.0026
205219_s_at	1.29	0.00749
205244_s_at	1.22	0.00132
205267_at	1.17	0.00386
205282_at	-1.48	0.00742
205311_at	-5.99	0.00661
205330_at	-1.57	0.000706
205346_at	-1.17	0.00178
205358_at	-1.46	0.00273
205390_s_at	-2.22	0.00394
205399_at	-2.76	0.000316
205493_s_at	-1.49	0.00121
205513_at	1.19	0.00668
205526_s_at	1.23	0.00402
205541_s_at	-1.47	0.00754
205550_s_at	-1.36	0.0025
205551_at	-2.96	0.00497
205613_at	-1.78	0.00379
205632_s_at	-3.8	0.0031
205638_at	-2.04	0.000123
205666_at	1.17	0.00729
205691_at	-4.08	0.00318
205708_s_at	-1.22	0.00878
205710_at	1.5	0.000879
205711_x_at	-1.44	0.00972
205737_at	-1.87	0.00216
205756_s_at	-1.25	0.00798
205771_s_at	-1.33	0.0018
205800_at	1.16	0.00291
205807_s_at	-1.31	0.00474
205839_s_at	-1.5	0.000127
205848_at	1.38	0.00409
205857_at	-11.4	4.12e-05
205923_at	1.89	0.00373
205936_s_at	1.16	0.000589
205960_at	2.18	0.00119
205977_s_at	1.15	0.0027
205998_x_at	1.24	0.00619
206017_at	-1.62	0.00905
206018_at	1.16	0.00602
206188_at	-1.1	0.00734
206196_s_at	-2.23	0.00694
206290_s_at	-2.14	0.00785
206342_x_at	-1.55	0.00739
206398_s_at	1.14	0.00294
206414_s_at	-1.46	0.00098
206427_s_at	1.11	0.00466
206460_at	-1.34	0.0078
206481_s_at	-1.96	4.97e-05
206495_s_at	1.25	0.00816
206496_at	1.2	0.00697
206502_s_at	-2.13	0.0075
206512_at	1.28	0.00886
206552_s_at	-3.27	0.000579
206559_x_at	1.2	0.00356
206592_s_at	-1.44	6.67e-05
206641_at	1.09	0.00612
206656_s_at	-1.26	0.00288
206765_at	1.6	0.00474
206784_at	1.16	0.00123
206787_at	-1.08	0.00605
206832_s_at	1.12	0.0048
206836_at	-7.04	0.000143
206850_at	-1.39	0.00699
206863_x_at	1.2	0.00284
206935_at	-4.18	0.0041
206953_s_at	-1.28	0.00327
206982_at	1.15	0.000726
207001_x_at	1.45	0.00473
207016_s_at	1.22	0.00547
207030_s_at	1.86	0.00869
207087_x_at	-1.89	0.00129
207091_at	2.19	0.00269
207109_at	1.12	0.00036
207112_s_at	1.35	0.00204
207115_x_at	1.18	0.00203
207143_at	1.21	0.00216
207170_s_at	-1.34	0.00264
207173_x_at	-1.89	0.0018
207230_at	1.16	0.000605
207284_s_at	1.17	0.00541
207288_at	1.17	0.00841
207352_s_at	1.18	0.00197
207389_at	1.15	0.000319
207465_at	-1.05	0.00479
207473_at	1.22	0.00229
207486_x_at	1.5	0.00483
207556_s_at	-1.47	0.00835
207588_at	-1.06	0.00416
207625_s_at	1.17	0.00998
207757_at	-1.11	0.00839
207795_s_at	1.14	0.00183
207822_at	1.26	0.00769
207869_s_at	-1.37	0.000101
207894_s_at	1.08	0.0036
207987_s_at	1.09	0.00331
208007_at	1.17	0.000574
208051_s_at	-1.88	0.00427
208073_x_at	-1.62	0.00047
208158_s_at	1.34	0.00935
208164_s_at	1.17	0.00122
208234_x_at	1.17	0.00641
208285_at	1.87	0.00674
208291_s_at	-14.58	0.000767
208352_x_at	-2.35	0.00425
208353_x_at	-1.9	0.00448
208479_at	1.17	0.00926
208527_x_at	1.42	0.00641
208576_s_at	1.12	0.0029
208579_x_at	1.48	0.00851
208632_at	-1.33	0.00255
208644_at	1.2	0.00745
208648_at	-1.23	0.0082
208658_at	1.49	0.00623
208693_s_at	-1.67	0.000837
208694_at	-1.5	0.00105
208720_s_at	1.34	0.00127
208732_at	-1.75	0.00738
208776_at	-1.37	0.00781
208794_s_at	-1.58	0.00158
208801_at	-1.49	0.00545
208807_s_at	-1.39	0.00459
208817_at	1.41	0.00436
208823_s_at	-1.31	0.000238
208838_at	-1.28	0.00631
208845_at	-1.54	0.00385
208858_s_at	-1.27	6.56e-05
208861_s_at	-1.39	0.00388
208870_x_at	-1.44	0.0036
208875_s_at	1.62	0.00139
208924_at	-1.46	0.00477
208960_s_at	1.35	0.00871
208968_s_at	-1.63	0.00595
209001_s_at	-1.29	0.000449
209014_at	-2.08	0.000662
209015_s_at	1.9	0.00877
209033_s_at	-1.31	0.00445
209036_s_at	-1.47	0.00138
209095_at	-1.86	0.00836
209102_s_at	1.38	0.00282
209113_s_at	1.17	0.00634
209134_s_at	1.27	0.00585
209146_at	-2.03	0.000325
209163_at	-2.09	0.00328
209206_at	-1.38	0.00945
209248_at	-1.62	0.00383
209256_s_at	-1.62	0.000802
209268_at	-1.34	0.00424
209282_at	1.19	0.00979
209296_at	1.55	0.00333
209300_s_at	-2.34	0.00881
209309_at	3.55	0.000352
209324_s_at	-1.56	0.00071
209325_s_at	-1.76	0.00526
209339_at	1.23	0.0083
209345_s_at	-1.53	0.00127
209352_s_at	-1.72	0.00114
209379_s_at	-1.39	0.00256
209414_at	-1.39	0.00258
209423_s_at	1.19	0.00319
209481_at	-1.65	0.000425
209485_s_at	1.77	0.00592
209511_at	1.42	0.00159
209529_at	2.08	0.000719
209530_at	-1.56	0.00284
209533_s_at	-1.33	0.00107
209553_at	-1.36	0.000173
209560_s_at	-4.48	0.00718
209581_at	1.68	0.000789
209610_s_at	-1.86	0.00242
209612_s_at	1.21	0.00931
209658_at	-1.33	0.00253
209667_at	-1.49	0.00179
209681_at	-1.31	0.000185
209701_at	1.21	0.009
209733_at	-1.14	0.000523
209741_x_at	-1.4	0.0045
209747_at	1.48	0.00622
209767_s_at	-1.43	0.00106
209794_at	-1.42	0.0095
209797_at	-1.54	9.03e-05
209817_at	-1.85	0.00474
209825_s_at	-1.27	0.00508
209840_s_at	-2.08	0.00696
209841_s_at	-2.07	0.00209
209850_s_at	1.17	0.00575
209859_at	-1.44	0.00845
209869_at	-1.38	0.000351
209903_s_at	-1.56	0.00479
209911_x_at	1.93	0.00419
209914_s_at	-1.75	0.00734
209952_s_at	1.13	0.00685
209987_s_at	1.63	0.00777
209990_s_at	-3.34	0.00123
210016_at	-2.24	0.00665
210024_s_at	-1.4	0.00914
210069_at	1.43	0.00925
210070_s_at	1.42	0.00117
210077_s_at	1.16	0.00393
210094_s_at	1.23	0.00224
210096_at	1.14	0.00753
210102_at	-1.47	0.00281
210108_at	-1.23	0.00782
210109_at	1.14	0.00406
210111_s_at	-1.49	0.000933
210123_s_at	-1.47	0.000988
210189_at	1.51	0.00228
210216_x_at	-1.17	0.0026
210226_at	1.12	0.00818
210295_at	1.13	0.00926
210323_at	1.18	0.00334
210372_s_at	1.85	0.00933
210380_s_at	-1.71	0.000123
210393_at	1.24	0.000966
210396_s_at	-1.82	0.00539
210405_x_at	1.17	0.00936
210425_x_at	-1.44	0.00919
210432_s_at	-3.25	0.00144
210454_s_at	-4.02	0.000569
210487_at	1.12	0.0028
210517_s_at	-2.37	0.00798
210539_at	1.09	0.00262
210555_s_at	1.45	0.000104
210575_at	1.15	0.00986
210579_s_at	1.1	0.00902
210598_at	1.12	0.0042
210645_s_at	-1.65	0.000662
210719_s_at	1.39	0.00484
210721_s_at	-1.1	0.000364
210730_s_at	1.16	0.00742
210817_s_at	1.35	0.00717
210840_s_at	1.36	0.0011
210949_s_at	-1.53	0.00398
210959_s_at	-1.35	0.00621
211006_s_at	-1.59	0.00977
211023_at	-1.4	0.00287
211034_s_at	-1.39	0.00332
211043_s_at	-1.51	0.00343
211056_s_at	-1.45	0.00346
211071_s_at	-2.32	0.00833
211120_x_at	1.22	0.00271
211207_s_at	-1.53	0.00601
211260_at	1.08	0.00899
211277_x_at	1.2	0.00451
211328_x_at	1.21	0.000249
211333_s_at	1.17	0.00134
211358_s_at	1.16	0.00747
211373_s_at	-1.65	0.000217
211378_x_at	-1.36	0.00987
211421_s_at	-4.5	0.00149
211432_s_at	1.33	0.00951
211438_at	1.19	0.00821
211462_s_at	1.1	0.000858
211538_s_at	1.62	0.00275
211566_x_at	-1.19	0.000129
211652_s_at	1.13	0.00568
211679_x_at	-2	0.00241
211713_x_at	1.52	0.00122
211716_x_at	-1.43	0.00227
211729_x_at	-1.34	0.0062
211921_x_at	1.68	0.00948
211922_s_at	1.54	0.00462
212003_at	1.28	0.00813
212072_s_at	-1.23	0.00328
212094_at	-3.92	0.00422
212096_s_at	1.61	0.00119
212100_s_at	1.27	0.00656
212104_s_at	-2.06	0.00162
212108_at	-1.24	0.00364
212112_s_at	-1.39	0.00248
212120_at	-1.52	0.00272
212144_at	1.54	0.00457
212148_at	-2.52	0.000945
212149_at	-1.49	0.007
212151_at	-2.25	0.00186
212158_at	-2	0.00548
212169_at	-1.24	0.00884
212213_x_at	-1.86	0.00448
212214_at	-1.69	0.00732
212221_x_at	-1.39	0.00747
212229_s_at	-1.54	0.00971
212248_at	-1.53	0.0021
212273_x_at	-1.43	0.00839
212279_at	-1.3	0.00798
212281_s_at	-1.72	1.87e-05
212282_at	-1.21	0.00964
212290_at	-1.12	0.00852
212301_at	-1.6	0.00302
212310_at	-1.86	8.6e-05
212332_at	1.3	0.00411
212346_s_at	1.21	0.00887
212348_s_at	-1.25	0.00279
212360_at	-1.4	0.0013
212369_at	1.18	0.00548
212474_at	-1.79	0.000825
212478_at	1.24	0.00032
212504_at	1.21	0.00382
212518_at	-1.41	0.00255
212520_s_at	-1.38	0.00561
212542_s_at	1.45	0.00214
212572_at	-1.33	0.005
212589_at	-1.62	0.00282
212590_at	-1.3	0.00149
212623_at	-1.42	0.00904
212625_at	1.27	0.000744
212626_x_at	1.27	0.00115
212632_at	-1.47	0.00192
212645_x_at	-1.31	0.000105
212653_s_at	-1.98	0.00722
212708_at	-1.6	0.00294
212722_s_at	1.6	0.00536
212731_at	-1.3	0.00945
212748_at	-1.21	0.00734
212759_s_at	1.3	0.00349
212775_at	-1.7	0.000119
212780_at	-1.28	0.000282
212789_at	1.23	0.00338
212800_at	1.29	0.000814
212807_s_at	1.64	0.0061
212820_at	-3.06	0.0027
212829_at	1.59	0.000508
212837_at	-1.2	0.00265
212842_x_at	-1.56	4.15e-05
212855_at	-1.52	0.00562
212887_at	-2.38	0.00976
212904_at	-1.31	0.00873
212943_at	-1.32	0.000582
212946_at	-1.57	0.00111
212954_at	1.18	5.16e-05
212956_at	-3.26	0.00119
212972_x_at	1.19	0.00138
212981_s_at	-1.53	0.00611
212984_at	-1.3	0.00147
212987_at	-1.84	0.00343
212990_at	-2.86	0.00226
213031_s_at	-1.19	0.00559
213061_s_at	-1.26	0.00902
213077_at	-2.3	0.000886
213143_at	-1.34	0.00174
213178_s_at	-1.42	0.00376
213195_at	-1.37	0.00248
213198_at	-1.36	0.00389
213215_at	-1.39	0.00196
213216_at	-1.39	0.00143
213222_at	-2	0.0021
213223_at	1.34	0.000814
213230_at	1.39	0.00725
213242_x_at	-1.5	0.00585
213262_at	-1.71	0.000107
213271_s_at	-2.24	7.11e-05
213273_at	-1.38	0.00691
213280_at	-1.87	0.0044
213294_at	-1.46	0.000129
213295_at	-1.34	0.00361
213296_at	1.22	0.00582
213304_at	-1.22	0.00384
213308_at	-1.74	3.29e-05
213327_s_at	-1.42	0.00151
213355_at	-1.21	0.00549
213358_at	-1.91	0.001
213366_x_at	-1.47	0.0035
213383_at	1.19	0.00869
213397_x_at	1.44	0.00181
213408_s_at	-1.6	0.00737
213479_at	4.45	0.00042
213480_at	-1.4	0.00277
213486_at	-2.21	0.00917
213496_at	-2.33	2.66e-05
213529_at	1.14	0.00173
213547_at	-1.39	0.000444
213558_at	-3	0.00119
213575_at	1.22	0.00447
213580_at	1.08	0.00265
213601_at	-2.46	0.000104
213605_s_at	1.54	0.00554
213609_s_at	-1.75	0.00207
213614_x_at	1.29	0.00894
213621_s_at	1.13	0.00839
213637_at	-1.19	0.00757
213641_at	1.25	0.009
213714_at	-1.6	0.00152
213720_s_at	-1.41	0.00143
213738_s_at	-1.65	0.00777
213760_s_at	1.18	0.00244
213793_s_at	-1.16	0.00644
213800_at	1.89	0.00197
213832_at	-2.42	0.00139
213834_at	-1.43	0.00408
213849_s_at	-1.36	0.00923
213863_s_at	1.12	0.00896
213878_at	-1.62	0.00192
213899_at	-1.22	0.0071
213904_at	-2.43	0.000289
213913_s_at	-1.94	0.00317
213920_at	-2.38	0.000309
213938_at	-3.85	1.52e-05
213960_at	-1.35	0.00601
213967_at	-2.89	0.00115
213968_at	1.13	0.000671
213997_at	-1.33	0.00441
214039_s_at	-1.28	0.00223
214046_at	-2.14	0.000513
214077_x_at	-1.56	0.000709
214117_s_at	1.19	0.00186
214120_at	-1.79	0.000146
214121_x_at	-1.4	0.00244
214156_at	-2.11	0.00233
214180_at	-1.43	0.00368
214230_at	-2.65	0.00202
214282_at	1.08	0.000365
214305_s_at	1.26	0.0062
214306_at	-2.06	1.55e-06
214330_at	-1.2	0.00311
214363_s_at	-1.25	0.00539
214401_at	1.13	0.00696
214430_at	-1.22	0.00792
214446_at	1.28	0.00265
214449_s_at	-1.38	0.00506
214481_at	1.23	0.00838
214491_at	1.15	0.00385
214542_x_at	1.27	0.00614
214544_s_at	1.21	0.00546
214616_at	1.18	0.00757
214674_at	-1.18	0.00817
214737_x_at	1.33	0.000347
214771_x_at	-1.14	0.00415
214773_x_at	-1.22	0.00136
214799_at	1.7	0.00545
214811_at	-2.44	0.00561
214830_at	-1.14	0.00988
214833_at	1.49	0.00525
214838_at	1.16	0.00062
214874_at	-2.6	0.00115
214920_at	-1.39	0.00837
214930_at	-1.98	0.00847
214949_at	-1.63	0.00567
214960_at	-1.22	0.00818
215047_at	-1.19	0.00394
215071_s_at	2.18	0.0049
215085_x_at	1.17	0.00989
215092_s_at	1.14	0.0071
215114_at	1.22	0.00219
215122_at	1.16	0.00235
215171_s_at	-1.42	0.00868
215200_x_at	1.19	0.0047
215228_at	-1.78	0.00591
215233_at	1.77	0.00632
215235_at	-1.93	0.00116
215360_at	1.09	0.00545
215427_s_at	-1.15	0.00737
215548_s_at	-1.56	0.00569
215616_s_at	1.15	0.00732
215636_at	1.1	0.00971
215650_at	1.15	0.00501
215743_at	1.16	0.00771
215767_at	-1.14	0.0064
215903_s_at	-1.49	0.0069
215947_s_at	-1.21	0.0012
215961_at	1.16	0.00118
216060_s_at	-1.35	0.00666
216086_at	-6.85	0.000118
216114_at	1.21	0.00703
216123_x_at	1.18	0.00167
216143_at	1.19	0.00111
216150_at	1.19	0.00538
216177_at	1.32	0.000694
216179_x_at	1.11	0.00718
216215_s_at	-1.72	0.00448
216221_s_at	-1.29	0.000796
216246_at	1.58	0.00223
216301_at	1.14	0.00694
216369_at	-1.08	0.00863
216384_x_at	1.41	0.00703
216399_s_at	-1.38	0.000286
216420_at	1.1	0.00682
216488_s_at	1.35	0.00139
216495_x_at	1.1	0.00355
216499_at	1.21	0.001
216506_x_at	1.15	0.00474
216524_x_at	1.34	0.00975
216570_x_at	1.31	0.00449
216613_at	-1.08	0.0093
216623_x_at	-1.83	0.000862
216646_at	1.14	0.0029
216650_at	1.17	0.00966
216690_at	1.16	0.00699
216710_x_at	1.07	0.00888
216730_at	1.21	8.21e-05
216751_at	1.21	0.00131
216759_at	1.07	0.00552
216853_x_at	1.15	0.00619
216869_at	1.27	0.00723
216898_s_at	1.12	0.00414
216925_s_at	1.14	0.00529
216938_x_at	-2.21	0.00933
216964_at	1.13	0.00915
217002_s_at	1.16	0.00538
217005_at	1.12	0.00866
217014_s_at	2.3	0.000593
217035_at	1.14	0.000205
217142_at	1.32	0.00364
217152_at	1.26	0.00759
217161_x_at	1.14	0.00931
217169_at	1.11	0.00794
217180_at	1.13	0.00322
217197_x_at	1.12	0.00777
217207_s_at	1.16	0.00662
217276_x_at	1.17	0.00267
217447_at	1.13	0.00899
217483_at	1.24	0.000694
217493_x_at	1.13	0.00219
217538_at	1.12	0.00202
217569_x_at	1.22	0.00319
217619_x_at	1.16	0.00961
217718_s_at	-1.3	0.00565
217737_x_at	1.28	0.00963
217800_s_at	-1.99	0.0091
217809_at	-1.3	0.00339
217824_at	-1.83	3.43e-06
217837_s_at	-1.59	0.00168
217838_s_at	-1.68	0.00641
217841_s_at	-1.36	0.00708
217879_at	-1.62	0.00437
217880_at	-1.34	0.00648
217885_at	-1.39	0.00161
217886_at	-1.43	0.0037
217897_at	-1.7	0.000408
217935_s_at	-1.52	0.00372
217942_at	-1.32	0.00668
217968_at	-1.32	0.00432
217976_s_at	-2.12	0.00298
217978_s_at	-1.26	0.00195
217979_at	-2.15	0.000776
218009_s_at	-1.21	0.00199
218023_s_at	-1.17	0.00509
218029_at	-1.21	0.00874
218042_at	-1.82	0.00911
218047_at	-1.46	0.00892
218058_at	1.22	0.00659
218081_at	-1.2	0.000795
218098_at	-1.5	0.000767
218118_s_at	-1.39	0.00933
218137_s_at	-1.89	0.00735
218139_s_at	-1.52	0.00178
218171_at	-1.59	0.00648
218175_at	-1.55	0.00937
218186_at	1.09	0.00907
218187_s_at	-1.32	0.00873
218208_at	-1.32	0.000298
[truncated: 11,212 more rows]
