# Supplementary material for: A Cross-Study Transcriptional Analysis of Parkinson's Disease
Source: PLoS One. 2009 Mar 23;4(3):e4955. doi: 10.1371/journal.pone.0004955 (PMC2654916; doi:10.1371/journal.pone.0004955)
Supplement: Table S3 — Over-represented pathway categories from IPA analysis. Over-represented pathway categories from IPA analysis of the differentally expressed probes of PD patients compared to controls: A- SN - Hauser study; B- SN - Zhang study; C- lateral SN - Moran study; D- medial SN - Moran study; E- SN - Lesnick study; F- Brodmann Area 9 - Zhang study; G- Putamen - Zhang study; H- Superior Frontal Gyrus - Moran study; I- Occipital Cortex - Vogt study; J- Putamen - Vogt study; K- Cerebellum - Vogt study; L- Whole Blood - Scherzer study; M- Laser Captured SN dopaminergic neurons - Castelvetri study. (0.07 MB XLS) [file pone.0004955.s003.xls]

## Sheet: Sheet1
Table S3- Over-represented pathway categories from IPA analysis
A - Over-represented pathway categories from IPA analysis of the differentally expressed probes in the SN of PD patients compared to controls in the Hauser study
IPA Pathway category	P-value	Number of genes differential expressed in PD	Differentially expressed genes
Phenylalanine Metabolism	0.0040738	3	DDC,GOT2,PRDX2
Dopamine Receptor Signaling	0.00630957	4	TH,PPP2R4,DDC,SLC6A3
Phenylalanine, Tyrosine and Tryptophan Biosynthesis	0.00812831	2	GOT2,FARSA
T Cell Receptor Signaling	0.0144544	4	FOS,CALM3,VAV3,TRA@
Tight Junction Signaling	0.017378	5	FOS,PPP2R4,MYL6B,CSTF3,PRKCZ
Huntington's Disease Signaling	0.0186209	6	HSPA1B,HSPA1A,DNAJB1,GNG3,GPAA1,PRKCZ
Tyrosine Metabolism	0.0204174	3	TH,DDC,GOT2
Ceramide Signaling	0.040738	3	FOS,PPP2R4,PRKCZ
Synaptic Long Term Depression	0.0467735	4	PPP2R4,GNA13,GNAL,PRKCZ
B- Over-represented pathway categories from IPA analysis of the differentally expressed probes in the SN of PD patients compared to controls in the Zhang study
IPA Pathway category	P-value	Number of genes differential expressed in PD	Differentially expressed genes
PPAR Signaling	0.000134896	15	PPARA,MAP3K14,RELA,PPARD,KRAS,NFKB1,IKBKB,RRAS2,JUN,MAP3K7,NGFR,NCOA1,IL1B,NCOR2,PPARGC1A
14-3-3-mediated Signaling	0.000295121	18	YWHAB,TYRO3,TUBB2A,TUBA4A,YWHAZ,MAPK9,KRAS,PLCL2,DDR1,RRAS2,JUN,FOXO1,ERBB4,MAPK10,PLCB1,MAPK7,RPS6KA1,SNCA
Oxidative Phosphorylation	0.000389045	19	NDUFC1,ATP6V1D,TCIRG1,UQCRB,NDUFB1,SDHC,ATP6V1A,NDUFA1,NDUFA2,ATP5C1,NDUFS1,COX11,ATP5B,NDUFA6,UQCRC2,NDUFA7,ATP5G3,NDUFA8,COX15
BMP signaling pathway	0.000398107	15	RELA,MAGED1,TYRO3,MAPK9,KRAS,NFKB1,DDR1,ZNF423,PRKAR2B,RRAS2,JUN,MAP3K7,ERBB4,MAPK10,MAPK7
IL-10 Signaling	0.000758578	11	RELA,IKBKB,MAP3K14,JUN,BLVRA,MAP3K7,TYK2,IL1B,STAT3,NFKB1,FCGR2B
B Cell Receptor Signaling	0.00131826	18	MAP3K14,RELA,MAP3K9,MAP3K11,CDC42,ABL1,MAPK9,KRAS,NFKB1,FCGR2B,IKBKB,JUN,RRAS2,PPP3CB,MAP3K7,VAV3,CD22,MAP3K3
Ubiquinone Biosynthesis	0.00144544	10	NDUFC1,NDUFS1,NDUFA6,COQ3,NDUFB1,NDUFA1,NDUFA2,NDUFA7,BCKDHB,NDUFA8
Toll-like Receptor Signaling	0.00154882	9	PPARA,RELA,IKBKB,MAP3K14,JUN,MAP3K7,MYD88,NFKB1,IRAK4
IL-6 Signaling	0.00165959	13	MAP3K14,RELA,MAPK9,KRAS,STAT3,NFKB1,IKBKB,RRAS2,JUN,MAP3K7,NGFR,MAPK10,IL1B
Mitochondrial Dysfunction	0.00204174	16	HSD17B10,MAPK9,NDUFB1,SDHC,PSEN2,UQCRB,NDUFA2,NDUFS1,COX11,NDUFA6,UQCRC2,MAPK10,SNCA,NDUFA7,NDUFA8,COX15
PPARα/RXRα Activation	0.00316228	19	PPARA,MAP3K14,RELA,TGFBR1,GNA11,CD36,KRAS,PLCL2,NFKB1,IKBKB,JUN,RRAS2,PRKAR2B,MAP3K7,IL1B,PLCB1,NCOR2,ADCY8,PPARGC1A
Hepatic Cholestasis	0.00354813	16	PPARA,MAP3K14,RELA,MYD88,MAPK9,NFKB1,IKBKB,PRKAR2B,JUN,SLCO3A1,MAP3K7,NGFR,MAPK10,IL1B,ADCY8,IRAK4
Glucocorticoid Receptor Signaling	0.00380189	26	RELA,TGFBR1,CXCL1,KRAS,NFKB1,PGR,IKBKB,JUN,PPP3CB,MAP3K7,VIPR1,GTF2H5,SUMO1,CDKN1C,MAP3K14,CCNH,TAF5L,MAPK9,STAT3,RRAS2,MAPK10,NCOA1,IL1B,NCOR2,POLR2K,UBE2I
Dopamine Receptor Signaling	0.00954993	10	TH,PRKAR2B,PPP2R3A (includes EG:5523),PTS,DDC,PPP2R2B,ADCY8,SLC18A2,PPP1R14B,SLC6A3
Lysine Degradation	0.0107152	9	HSD17B10,AASDHPPT,ALDH1A1,PCSK7,DLST,PIPOX,PLOD1,SHMT2,ALDH7A1
Synaptic Long Term Depression	0.0109648	15	GNA11,YWHAZ,C7ORF16,KRAS,GNA14,LAMB2,RRAS2,IGF1,PPP2R3A (includes EG:5523),PPP2R2B,PLCB1,ADCY8,GUCY1B3,GNAL,GRIA3
Ceramide Signaling	0.0114815	10	RELA,JUN,RRAS2,CNKSR1,PPP2R3A (includes EG:5523),NGFR,PPP2R2B,KRAS,CERK (includes EG:64781),NFKB1
PI3K/AKT Signaling	0.0144544	13	RELA,YWHAB,TYK2,YWHAZ,KRAS,NFKB1,EIF4E,IKBKB,RRAS2,FOXO1,PPP2R3A (includes EG:5523),PPP2R2B,FOXO3
PXR/RXR Activation	0.0158489	9	PPARA,RELA,ALDH1A1,PRKAR2B,FOXO1,CYP3A4,FOXO3,NCOA1,PPARGC1A
JAK/Stat Signaling	0.0162181	8	STAT6,PIAS2,RRAS2,CISH,TYK2,KRAS,STAT3,SUMO1
IGF-1 Signaling	0.0234423	10	PRKAR2B,JUN,RRAS2,FOXO1,IGF1,YWHAB,FOXO3,YWHAZ,IGFBP5,KRAS
Hepatic Fibrosis / Hepatic Stellate Cell Activation	0.0251189	13	MYH10,RELA,TGFBR1,CXCL1,IGFBP5,NFKB1,FGF1,IGF1,NGFR,IFNA7,MYH9,IL1B,AGTR1
Citrate Cycle	0.025704	5	DLST,SDHC,FH,MDH1,ATP5G3
Ephrin Receptor Signaling	0.0295121	16	MAP3K14,PAK4,CXCR4,EPHB2,GNA11,GNB5,ABL1,KRAS,STAT3,GNG3,GNA14,FGF1,RRAS2,SDC2,EPHA5,GNAL
Synaptic Long Term Potentiation	0.0338844	11	PRKAR2B,RRAS2,PPP3CB,GNA11,PLCB1,KRAS,RAPGEF3,RPS6KA1,ADCY8,PPP1R14B,GRIA3
LXR/RXR Activation	0.040738	8	RELA,LDLR,NGFR,CD36,IL1B,NCOR2,NFKB1,HMGCR
C- Over-represented pathway categories from IPA analysis of the differentally expressed probes in the lateral SN of PD patients compared to controls in the Moran study
IPA Pathway category	P-value	Number of genes differential expressed in PD	Differentially expressed genes
Inositol Phosphate Metabolism	0.000933254	22	AKT2,DAPK1,PAK2,SGK1,CDK6,MAPK9,PIP5K1B,PIK3R3,PAK1,CDK8,IHPK3,PI4K2A,PAK3,SYNJ1,ITPKB,PIP5K1C,GRK6,PLCB1,PAK7,EIF2AK2,PIP4K2A,DYRK1A
Dopamine Receptor Signaling	0.00301995	14	ADCY9,GCH1,PPP2R5C,DDC,SLC18A2,DRD2,SLC6A3,TH,PRKAR2B,COMT,PPP2R2B,PPP2R1B,MAOA,CALY
Cardiac β-adrenergic Signaling	0.00363078	19	AKAP12,ADCY9,CACNA1D,PLN,PPP2R5C,PDE1A,AKAP7,PDE4D,GNG7,PDE1C,GNB1,GNAS,PRKAR2B,PPP2R2B,AKAP10 (includes EG:11216),GNG2,SLC8A1,GNB1L,PPP2R1B
Valine, Leucine and Isoleucine Biosynthesis	0.0040738	5	BCAT1,RAB3GAP2,VARS,IARS (includes EG:3376),PDHB
Huntington's Disease Signaling	0.0047863	29	POLR2F,SGK1,HSPA1A,HSPA6,CDK5R1,GNG7,GNB1,HSPA1L,SOS1,IGF1R,PLCB1,GNB1L,RASA1,AKT2,MAP2K7,HDAC2,GLS,TBP,MAPK9,POLR2J2,HIP1,ITPR1,HSPA2,ATF2,PIK3R3,DNAJC5,CACNA1B,GNG2,SNCA
SAPK/JNK Signaling	0.00588844	15	MAP2K7,NFATC3,MAP3K1,MAPK9,KRAS,MAPK8IP3,GNG7,ATF2,GNB1,PIK3R3,RRAS2,SOS1,GNG2,MAP3K3,TRA@
Nicotinate and Nicotinamide Metabolism	0.00660693	15	DAPK1,AKT2,PAK2,SGK1,CDK6,MAPK9,NT5C2,PAK1,CDK8,NNT,PAK3,GRK6,PAK7,EIF2AK2,DYRK1A
Axonal Guidance Signaling	0.0074131	43	PLXNA3,SLIT1,NFATC3,ARHGEF7,UNC5B,KRAS,PLXNA2,GNG7,GNB1,PAK1,NFAT5,PPP3CB,PLXNA1,SDC2,SOS1,PLCB1,RASSF5,ROBO2,SEMA4A,GNB1L,RASA1,SEMA3F,EPHA7,AKT2,PAK2,SHANK2,EPHA1,L1CAM,GIT1,MYL9 (includes EG:10398),PIK3R3,GNAS,SRGAP3,RRAS2,PRKAR2B,PAK3,MAG (includes EG:4099),NTRK3,SEMA6D,GNAO1,PAK7,BMP7,GNG2
Ceramide Signaling	0.0234423	12	PIK3R3,AKT2,RRAS2,SPHK2,PPP2R5C,PPP2R2B,MAP3K1,KRAS,DIABLO,ENPP7,SMPD3,PPP2R1B
cAMP-mediated Signaling	0.0269153	20	AKAP12,ADCY9,CAMK1D,RGS7,RGS4,DRD2,PDE1A,RGS12,AKAP7,PDE4D,ATF2,PDE1C,ADRA2A,GNAS,CAMK2D,PRKAR2B,PPP3CB,RAP1GAP (includes EG:5909),GNAO1,AKAP10 (includes EG:11216)
PTEN Signaling	0.0281838	13	AKT2,KRAS,FOXG1,CNKSR3,PIK3R3,RRAS2,MAGI1,FOXO1,SOS1,FOXO3,CSNK2A1,INSR,FASLG
α-Adrenergic Signaling	0.0331131	13	ADCY9,PYGL,KRAS,ITPR1,GNG7,ADRA2A,GNB1,GNAS,PRKAR2B,RRAS2,GNG2,SLC8A1,GNB1L
Glutamate Receptor Signaling	0.0346737	9	GNB1,SLC1A4,GLS,GRIK3,GRIA2,GNG2,HOMER1,GNG7,GRIA3
G-Protein Coupled Receptor Signaling	0.040738	23	ADCY9,AKT2,RGS7,RGS16,RGS4,KRAS,DRD2,PDE1A,RGS12,PDE4D,ATF2,PDE1C,PIK3R3,ADRA2A,GNAS,RRAS2,CAMK2D,PRKAR2B,RAP1GAP (includes EG:5909),SOS1,GNAO1,PLCB1,RASA1
Fatty Acid Biosynthesis	0.0436516	3	OLAH,ACSL3,BTD
D- Over-represented pathway categories from IPA analysis of the differentally expressed probes in the medial SN of PD patients compared to controls in the Moran study
IPA Pathway category	P-value	Number of genes differential expressed in PD	Differentially expressed genes
Huntington's Disease Signaling	0.000912011	33	POLR2F,VTI1A,REST,PIK3R1,GNB2L1,GNA11,VTI1B,CPLX2,PIK3C3,HDAC7,SOS1,VAMP3,IGF1R,AKT3,POLR2H,PLCB1,ATF4,NCOR1,AKT2,HDAC4,CLTC,CREBBP,HDAC1,MAPK8,MAPK9,POLR2J2,CAPN10,HIP1,ITPR1,CACNA1B,PLCB3,STX16,PIK3CB
Glucocorticoid Receptor Signaling	0.00194984	36	TAF4B,POLR2F,GTF2F2,PIK3R1,PBX1,SMARCD2,CD163,BCL2,PGR,TSC22D3,NFKBIA,PIK3C3,SOS1,MRAS,AKT3,POLR2H,NCOR1,CDKN1C,FKBP5,MAP3K7IP1,AKT2,SRA1,CCNH,CREBBP,MAPK8,MAPK9,POLR2J2,PCK1,STAT3,NCOA3,PCAF,RRAS2,TGFB3,PIK3CB,HLTF,UBE2I
Estrogen Receptor Signaling	0.00239883	19	TAF4B,POLR2F,SRA1,CCNH,GTF2F2,CREBBP,HNRPD,POLR2J2,RBM9,PCK1,NCOA3,PGR,SPEN,PCAF,RRAS2,CTBP2,SOS1,MRAS,POLR2H
Fc Epsilon RI Signaling	0.00363078	17	VAV2,FYN,AKT2,PLA2G12A,PIK3R1,MAPK8,MAPK9,INPPL1,INPP5D,RRAS2,PIK3C3,SOS1,LOC100137047-PLA2G4B,MRAS,LYN,AKT3,PIK3CB
GM-CSF Signaling	0.0047863	12	AKT2,RRAS2,PIK3C3,PIK3R1,GNB2L1,SOS1,MRAS,LYN,AKT3,PIK3CB,STAT3,CAMK2B
VEGF Signaling	0.00549541	15	AKT2,PIK3R1,EIF1,EIF2B3,BCL2,ROCK1,RRAS2,FOXO1,PIK3C3,SOS1,MRAS,AKT3,PIK3CB,ACTN4,ACTC1
Ephrin Receptor Signaling	0.00645654	25	FYN,GRIN2A,ARPC1B,PDGFA,EPHB2,AXIN1,GNB2L1,GNA11,PAK1,SORBS1,SOS1,MRAS,AKT3,ATF4,AKT2,PAK6,CFL1,CXCR4,STAT3,ROCK1,RRAS2,GNAO1,EPHA5,DOK1,GNAL
B Cell Receptor Signaling	0.00758578	22	VAV2,MAP3K9,AKT2,CDC42,PIK3R1,MAPK8,MAPK9,INPPL1,BCL6,INPP5D,RRAS2,NFKBIA,DAPP1,PIK3C3,SOS1,MRAS,LYN,CD22,ATF4,AKT3,PIK3CB,CAMK2B
Insulin Receptor Signaling	0.0112202	19	PPP1CC,PPP1R14C,FYN,AKT2,PIK3R1,MAPK8,EIF2B3,INPPL1,INPP5D,GRB10,PRKAR2B,RRAS2,FOXO1,PIK3C3,SOS1,MRAS,AKT3,PIK3CB,INSR
JAK/Stat Signaling	0.0114815	11	AKT2,PIAS2,PIAS4,RRAS2,PIK3C3,PIK3R1,SOS1,MRAS,AKT3,PIK3CB,STAT3
Dopamine Receptor Signaling	0.0131826	13	PPP1R14C,GCH1,PPP1CC,DDC,SLC18A2,DRD2,SLC6A3,TH,PRKAR2B,COMT,SLC18A1,PPP2R1B,MAOA
PDGF Signaling	0.0147911	12	MYC,RRAS2,PDGFA,PIK3C3,PIK3R1,SOS1,MAPK8,MRAS,INPPL1,PIK3CB,STAT3,INPP5D
G-Protein Coupled Receptor Signaling	0.0158489	26	FYN,PIK3R1,GNA11,PDE1A,RGS12,PDE4D,NFKBIA,PIK3C3,SOS1,MRAS,PLCB1,AKT3,ATF4,PDE11A,CAMK2B,AKT2,RGS7,RAPGEF3,STAT3,DRD2,PRKAR2B,RRAS2,GNAO1,PLCB3,PIK3CB,AGTR1
Inositol Phosphate Metabolism	0.0194984	19	MAP3K9,AKT2,DAPK1,DMPK,PIK3R1,MAPK8,MAPK9,INPPL1,PIP5K1B,INPP5D,PAK1,PRKX,ITPKB,PRPF4B,PIK3C3,PLCB1,PLCB3,PIK3CB,PIP4K2A
Neurotrophin/TRK Signaling	0.020893	11	RRAS2,NTF4,NTRK3,SPRY2,PIK3C3,PIK3R1,SOS1,MAPK8,MRAS,ATF4,PIK3CB
p53 Signaling	0.0213796	14	AKT2,GADD45G,PIK3R1,RRM2B,MAPK8,TP53BP2,BCL2,PCAF,STAG1,PIK3C3,AKT3,PIK3CB,LRDD,ATR
PTEN Signaling	0.0213796	14	AKT2,PIK3R1,INPPL1,INPP5D,BCL2,RRAS2,MAGI1,FOXO1,SOS1,MRAS,AKT3,PIK3CB,INSR,MAGI-3
FGF Signaling	0.0218776	13	AKT2,PIK3R1,FGFR1,MAPK8,STAT3,ITPR1,FGF13,PIK3C3,SOS1,ATF4,AKT3,PIK3CB,MAPKAPK2
Nicotinate and Nicotinamide Metabolism	0.025704	14	MAP3K9,DAPK1,AKT2,DMPK,MAPK8,QPRT,MAPK9,NT5C2,ENPP3,PAK1,PRKX,PRPF4B,NMNAT2,NMNAT3 (includes EG:349565)
IL-2 Signaling	0.0288403	9	AKT2,RRAS2,PIK3C3,PIK3R1,SOS1,MAPK8,MRAS,AKT3,PIK3CB
Integrin Signaling	0.0346737	25	FYN,PPP1CC,ARHGAP26,ARPC1B,ARHGEF7,PIK3R1,TSPAN3,PAK1,RHOT1,PIK3C3,SOS1,MRAS,AKT3,ACTC1,AKT2,PAK6,MAPK8,RHOJ,BCAR3,CAPN10,ROCK1,ARF1,RRAS2,PIK3CB,ACTN4
TGF-β Signaling	0.0363078	12	PIAS4,RRAS2,SOS1,CREBBP,TGFB3,MAPK8,MRAS,MAPK9,SMAD5,HNF4A,TGIF1,MAP3K7IP1
IGF-1 Signaling	0.0380189	13	AKT2,PIK3R1,MAPK8,GRB10,PRKAR2B,RRAS2,FOXO1,PIK3C3,SOS1,IGF1R,MRAS,AKT3,PIK3CB
Synaptic Long Term Potentiation	0.0389045	15	PPP1CC,PPP1R14C,GRIN2A,CREBBP,GNA11,RAPGEF3,ITPR1,GRIN3A,PRKAR2B,RRAS2,MRAS,PLCB1,ATF4,PLCB3,CAMK2B
Actin Cytoskeleton Signaling	0.0446684	26	ABI2,PPP1CC,ARPC1B,PDGFA,ARHGEF7,PIK3R1,PIP5K1B,IQGAP1 (includes EG:8826),FGF13,PAK1,EZR,PIK3C3,PFN4,SOS1,MRAS,SSH2,ACTC1,VAV2,PAK6,CFL1,APC,ROCK1,RRAS2,PIK3CB,ACTN4,PIP4K2A
SAPK/JNK Signaling	0.047863	13	MAP3K9,DUSP8,PIK3R1,MAPK8,MAPK9,TRADD,DAXX,RRAS2,PIK3C3,SOS1,MRAS,PIK3CB,MAP3K7IP1
PPAR Signaling	0.047863	13	SRA1,PDGFA,CREBBP,AIP,NR2F1,NFKBIA,RRAS2,SOS1,MRAS,NCOR1,INSR,RXRA,MAP3K7IP1
E- Over-represented pathway categories from IPA analysis of the differentally expressed probes in the SN of PD patients compared to controls in the Lesnick study
IPA Pathway category	P-value	Number of genes differential expressed in PD	Differentially expressed genes
PXR/RXR Activation	0.000169824	15	PPARA,PRKACB,RELA,SCD,AKT2,CYP2C9,CES2 (includes EG:8824),NR3C1,ABCB9,ALDH1A1,FOXO3,PRKACA,NCOA1,AKT3,INSR
Estrogen Receptor Signaling	0.000416869	19	RAF1,POLR2F,SRA1,CREBBP,NR3C1,G6PC3,SMARCA4,PGR,SPEN,PCAF,TAF4,TAF5,NCOA2,CTBP2,SOS1,MRAS,NCOA1,POLR2H,TAF3
Glucocorticoid Receptor Signaling	0.00114815	33	PRKACB,RELA,RAF1,POLR2F,HSPA1B,HSPA1A,PBX1,NR3C1,SMARCA4,PGR,NFAT5,NCOA2,HSPA1L,SOS1,MRAS,AKT3,POLR2H,TAF3,NCOR1,CDKN1C,AKT2,SRA1,MAP3K1,CREBBP,PCAF,TAF4,TAF5,FKBP4,NCOA1,PRKACA,HSP90AA1,PIK3CD,TRA@
PTEN Signaling	0.00645654	14	RAF1,AKT2,INPPL1,BCAR1,INPP5D,SOS1,FOXO3,CSNK2A1,MRAS,AKT3,PIK3CD,INSR,ZCCHC2,BCL2L11
PI3K/AKT Signaling	0.00660693	17	TP53,RELA,RAF1,AKT2,PPP2R5C,TYK2,INPPL1,MAPK8IP1,EIF4E,INPP5D,GAB1 (includes EG:2549),FOXO3,SOS1,MRAS,HSP90AA1,AKT3,PIK3CD
Aryl Hydrocarbon Receptor Signaling	0.00776247	19	TP53,TRIP11,RELA,CCNE2 (includes EG:9134),NFIC,TFDP1,POLA1,SMARCA4,NR2F1,CCNA2,ALDH1A1,NCOA2,SP1,NFIA,RARB,GSTM4,HSP90AA1,NFIB,MCM7
IL-4 Signaling	0.00933254	11	AKT2,HLA-DOA,NFAT5,SOS1,TYK2,MRAS,AKT3,INPPL1,PIK3CD,NR3C1,INPP5D
Lysine Degradation	0.00933254	11	ALDH1A1,PPP2R5C,EHMT2,DOT1L,SETD7,DBT,EHMT1,MLL3,SDS,SHMT2,PLOD3
VEGF Signaling	0.00954993	13	EIF2S2,RAF1,AKT2,FLT1,EIF1,ACTG1,ROCK2,SOS1,KDR,FOXO3,MRAS,AKT3,PIK3CD
Insulin Receptor Signaling	0.011749	17	PRKACB,PPP1CC,RAF1,AKT2,INPPL1,PPP1R14B,EIF4E,INPP5D,PTPN11,PPP1R7,FOXO3,SOS1,PRKACA,MRAS,AKT3,PIK3CD,INSR
IGF-1 Signaling	0.0128825	13	PRKACB,RAF1,AKT2,IGFBP5,PTPN11,SOS1,FOXO3,PRKACA,IGF1R,CSNK2A1,MRAS,AKT3,PIK3CD
p53 Signaling	0.0154882	13	TP53,PLAGL1,AKT2,TP63,JMY,CSNK1D,TP53BP2,BIRC5,PCAF,STAG1,AKT3,PIK3CD,LRDD
Amyloid Processing	0.0154882	9	CSNK1E,PRKACB,AKT2,CSNK2A1,PRKACA,CSNK1D,MARK1,AKT3,CAPN7
Dopamine Receptor Signaling	0.025704	11	PRKACB,TH,PPP1CC,PPP2R5C,PPP1R7,DDC,PRKACA,DRD2,SLC18A2,PPP1R14B,SLC6A3
Aminophosphonate Metabolism	0.0288403	4	PCYT1B,CEPT1,CHPT1,PCYT1A
JAK/Stat Signaling	0.0301995	9	RAF1,AKT2,PIAS4,PTPN11,SOS1,TYK2,MRAS,AKT3,PIK3CD
PDGF Signaling	0.0323594	10	RAF1,SOS1,TYK2,MAP3K1,CSNK2A1,MRAS,INPPL1,PIK3CD,EIF2AK2,INPP5D
IL-2 Signaling	0.0338844	8	RAF1,AKT2,PTPN11,SOS1,CSNK2A1,MRAS,AKT3,PIK3CD
BMP signaling pathway	0.0346737	13	PRKACB,RELA,RAF1,FST,FGFR1,CREBBP,SMAD5,SMURF1,FGFR3,SOS1,PRKACA,MRAS,BMP1
Protein Ubiquitination Pathway	0.0363078	21	USP21,USP28,PSMA3,PSMB5,UBE2H,UBE2Q1,UBE2L3,USP54,PSMD6,SMURF1,USP31,PAN2 (includes EG:9924),TCEB2,USP13,PSMB2,CUL2,HSP90AA1,UBE2D3,USP46,USP34,USP25
PPAR Signaling	0.0371535	12	NR2F1,PPARA,RAF1,RELA,SRA1,SOS1,CREBBP,NCOA1,MRAS,HSP90AA1,NCOR1,INSR
RAR Activation	0.047863	19	PRKACB,RELA,AKT2,SRA1,NR2F2,CREBBP,MAP3K1,SMAD5,SMARCA4,NR2F1,PCAF,ALDH1A1,TAF4,RARB,PRKACA,CSNK2A1,NCOA1,AKT3,PIK3CD
Axonal Guidance Signaling	0.0489779	36	PRKACB,RAF1,SLIT1,ADAM22,ITSN1,ARHGEF7,UNC5B,BCAR1,NTN1,EIF4E,NCK2,ROCK2,NFAT5,SOS1,MRAS,AKT3,ABLIM2,ROBO2,GNG4,SEMA3F,BMP1,EPHA10,SEMA3G,PAK4,AKT2,ADAM15,CXCR4,FZD9,EPHA3,ADAM18,GNAS,ADAM12,PTPN11,GNAO1,PRKACA,PIK3CD
F- Over-represented pathway categories from IPA analysis of the differentally expressed probes in the Brodmann Area 9 of PD patients compared to controls in the Zhang study
IPA Pathway category	P-value	Number of genes differential expressed in PD	Differentially expressed genes
Oxidative Phosphorylation	5.88844e-07	39	SDHB,COX7B,ATP6V0C,ATP6V1D,ATP6V1C1,COX10,NDUFB5,ATP5L,UQCRB,ATP6AP1,UQCRH,NDUFA5,NDUFS1,NDUFAB1,ATP5H (includes EG:10476),ATP5J2,NDUFS2,ATP6V1G1,ATP6V1G2,ATP5G3,NDUFS4,ATP5A1,COX6C,SDHC,ATP6V1A,NDUFA13,ATP5C1,COX11,ATP5B,NDUFV2,PPA2,ATP6V0A2,UQCRC2,NDUFB7,COX5A,CYC1,ATP6V0E1,ATP6V1B2,COX15
Axonal Guidance Signaling	1.44544e-06	75	PRKACB,ITSN1,MYL6,NFATC3,PIK3R1,ARPC5,GNB2L1,GNB5,KRAS,PAK1,PPP3R1,BAIAP2,ARPC4,PLCB1,PLXNB2,GSK3B,ACTR2,ARHGEF15,FZD9,L1CAM,GNG3,PDGFB,GNAO1,RTN4,FZD3,ADAM17,RND1,RGS3,BDNF,EPHA4,ABLIM1,GNG7,EIF4E,PGF,SHC1,WNT7A,WASL (includes EG:8976),CDK5,PPP3CB,IGF1,NGFR,MKNK1,SMO,AKT3,ROBO2,MAP2K1,PPP3CA,BMP1,EPHB4,PXN,NRP2,SHANK2,ARPC5L (includes EG:81873),GRB2,CHP,PFN2,NFATC1,NFATC4,EPHA3,ROBO3,PLXND1,ROCK…
Synaptic Long Term Potentiation	0.000269153	26	PRKACB,CALM2,PPP1CB,KRAS,PPP1R14B,PPP1R10,PPP3CB,PPP1R7,PPP3R1,PLCB1,MAP2K1,PPP3CA,CALM1,CALM3,ITPR2,CHP,ITPR1,ATF2,PLCB4,PRKCI,PRKAR2B,PPP1R12A,RPS6KA1,PRKCB1,GRIA3,PRKAR1A
14-3-3-mediated Signaling	0.000275423	30	YWHAH,PIK3R1,MAPT,KRAS,FGFR3,DDR2,PDGFRA,AKT3,PLCB1,GSK3B,MAP2K1,PDGFRB,TUBB3,YWHAB,GRB2,TNFRSF1A,FGFR1,TUBB2A,YWHAZ,PLCG1,PLCL2,TRAF2,PLCB4,PRKCI,FOXO1,MAPK10,RPS6KA1,CDKN1B,SNCA,PRKCB1
ERK/MAPK Signaling	0.000331131	38	HSPB3,PRKACB,YWHAH,PPP2CA,DUSP6,PIK3R1,ETS2,PPP1CB,KRAS,PPP1R14B,EIF4E,KSR1,SHC1,PAK1,PPP1R10,PPP1R7,MKNK1,MAP2K1,PXN,YWHAB,GRB2,YWHAZ,PLCG1,MKNK2,ATF2,PRKCI,PRKAR2B,PAK3,PPP2R3A (includes EG:5523),LOC100137047-PLA2G4B,PPP1R12A,DUSP4,RPS6KA1,PPP2R5E,PPP2R1B,HSPB1,PRKAR1A,PRKCB1
B Cell Receptor Signaling	0.000562341	32	RELA,CDC42,NFATC3,PIK3R1,CALM2,INPPL1,KRAS,NFKB1,BCL6,SHC1,FRAP1,NFKBIA,PPP3CB,PPP3R1,CD22,AKT3,GSK3B,MAP2K1,PPP3CA,CALM1,MAP2K7,CALM3,GRB2,CSK,EGR1,NFATC1,NFATC4,ATF2,DAPP1,MAP2K3,MAP3K3,PRKCB1
Huntington's Disease Signaling	0.00057544	43	SDHB,BDNF,REST,PIK3R1,GNB2L1,GNB5,HDAC9,CASP4,GNG7,TGM2,SHC1,FRAP1,POLR2C,CDK5,IGF1,CASP1,PLCB1,AKT3,UBB,MAP2K7,CAPN6,HDAC2,GRB2,GLS,CLTC,HDAC1,IFT57,ITPR1,GNG3,SNAP25,RPH3A,TAF9B,ATF2,PLCB4,PRKCI,ATP5B,CASP2,PENK,UBC,GOSR2,SNCA,PRKCB1,POLR2K
PI3K/AKT Signaling	0.00154882	26	RELA,YWHAH,PPP2CA,PIK3R1,INPPL1,KRAS,NFKB1,NOS3,CCND1,EIF4E,SHC1,FRAP1,NFKBIA,HSP90AB1,AKT3,GSK3B,MAP2K1,GRB2,YWHAB,TYK2,YWHAZ,FOXO1,PPP2R3A (includes EG:5523),PPP2R5E,CDKN1B,PPP2R1B
Insulin Receptor Signaling	0.00177828	27	PRKACB,PIK3R1,PPP1CB,INPPL1,KRAS,PPP1R14B,EIF4E,SHC1,FRAP1,PPP1R10,PPP1R7,PTPN1,AKT3,GSK3B,MAP2K1,GRB2,EIF2B3,ACLY,VAMP2,PRKCI,ACCN1,PRKAR2B,FOXO1,SH2B2,SCNN1B,PPP1R12A,PRKAR1A
Calcium Signaling	0.00288403	34	PRKACB,MYH10,TPM1,MYL6,ATP2B1,NFATC3,RCAN2,CALM2,HDAC9,PPP3CB,PPP3R1,PPP3CA,CALM1,GRIK1,CALM3,HDAC2,ITPR2,CHP,HDAC1,TPM2,NFATC1,ITPR1,NFATC4,ATP2B2,ATF2,PRKAR2B,TPM3,ATP2B3,CHRNE,MEF2C,CAMKK2,RAP2A,GRIA3,PRKAR1A
Purine Metabolism	0.00323594	51	ATP5L,DLG2,PRPS1,ATP5H (includes EG:10476),ADA,PSMC2,RAD51C,GUCY1B3,ATP5G3,POLR3C,NME5,POLR1B,PDE9A,ATP5A1,DGUOK,RALBP1,ATP5C1,PRPS2,ATP5B,MPP3,HPRT1,ATP6V0E1,POLR2K,RFC3,POLE3,POLR3F,NME1,ATP5S,SMARCA4,NME7,POLR2C,MYO9B,AK1,ATP5J2,ATP6V1G1,ATP6V1G2,PKM2,ADCY2,ATP1B1,PDE4C,DCK,POLG,DLG3,ADSS,POLR3K,ITPA,PAPSS1,PDE8B,HLTF,PSMC3,ADARB2
VEGF Signaling	0.00489779	19	EIF2S2,PXN,GRB2,ACTN2,PIK3R1,EIF2B3,PLCG1,KRAS,EIF2S1,NOS3,ACTG1,PGF,ROCK1,SHC1,FOXO1,EIF1AX,AKT3,MAP2K1,PRKCB1
T Cell Receptor Signaling	0.00501187	21	RELA,CALM3,GRB2,NFATC3,CSK,PIK3R1,CALM2,PLCG1,KRAS,NFATC1,NFATC4,NFKB1,CD28,NFKBIA,PPP3CB,PPP3R1,RASGRP1,LAT,MAP2K1,PPP3CA,CALM1
α-Adrenergic Signaling	0.00562341	20	PRKACB,ADCY2,CALM3,ITPR2,GNB2L1,GNB5,CALM2,PLCG1,KRAS,ITPR1,GNG3,PHKA2,GNG7,GNAS,PRKCI,PRKAR2B,MAP2K1,CALM1,PRKCB1,PRKAR1A
Cell Cycle: G2/M DNA Damage Checkpoint Regulation	0.00588844	11	UBB,PRKDC,MYT1,YWHAB,YWHAZ,PLK1,RPS6KA1,UBC,SKP1,ATM,SKP2
BMP signaling pathway	0.00724436	21	PRKACB,RELA,GRB2,FGFR1,SMAD6,BMPR2,KRAS,NFKB1,ATF2,FGFR3,PRKAR2B,DDR2,RUNX2,MAPK10,PDGFRA,BMP7,MAP2K1,SMAD1,PDGFRB,PRKAR1A,BMP1
PTEN Signaling	0.00954993	19	YWHAH,GRB2,PIK3R1,BMPR2,KRAS,INPPL1,NFKB1,CCND1,SHC1,MAGI1,FOXO1,NGFR,PDGFRA,CSNK2A1,AKT3,GSK3B,CDKN1B,MAP2K1,PDGFRB
RAR Activation	0.0109648	31	PRKACB,RELA,PIK3R1,SMAD3,NR2F2,SMARCD2,NFKB1,SMARCA4,RARB,CSNK2A1,AKT3,MAP2K1,SMAD1,MMP1 (includes EG:4312),CITED2,GTF2H3,ADCY2,CCNH,PRMT2,IL3RA,CSK,SMAD6,PRKCI,PRKAR2B,SMARCA2,TGFB3,MAPK10,HLTF,SCAND1,PRKAR1A,PRKCB1
Integrin Signaling	0.0123027	35	ITGA2B (includes EG:3674),PIK3R1,ARPC5,PPP1CB,KRAS,ITGA10,TSPAN3,SHC1,PAK1,WASL (includes EG:8976),ITGA9 (includes EG:3680),ARF4,ARPC4,AKT3,GSK3B,MAP2K1,ITGB5,ACTR2,PXN,CAPN6,TSPAN5,GRB2,ARPC5L (includes EG:81873),ACTN2,RALB,PLCG1,ACTG1,ROCK1,ARF1,WIPF1,ARF5,PAK3,PPP1R12A,ITGA7,RAP2A
Ephrin Receptor Signaling	0.0128825	31	RGS3,ITSN1,GNB2L1,ARPC5,GNB5,EPHA4,KRAS,GNG7,PGF,SHC1,PAK1,WASL (includes EG:8976),ARPC4,AKT3,MAP2K1,ACTR2,EPHB4,PXN,ANGPT1,GRB2,ARPC5L (includes EG:81873),ARHGEF15,EPHA3,GNG3,PDGFB,ATF2,ROCK1,GNAS,WIPF1,PAK3,GNAO1
IGF-1 Signaling	0.0154882	18	PRKACB,PXN,YWHAH,GRB2,YWHAB,PIK3R1,YWHAZ,KRAS,NEDD4,SHC1,PRKCI,PRKAR2B,FOXO1,IGF1,CSNK2A1,AKT3,MAP2K1,PRKAR1A
Cardiac β-adrenergic Signaling	0.0162181	23	PRKACB,ADCY2,PDE4C,PPP2CA,GNB2L1,GNB5,PPP1CB,GNG3,PPP1R14B,GNG7,AKAP11,GNAS,AKAP13,AKAP2,PRKAR2B,PPP1R10,PPP2R3A (includes EG:5523),PPP1R7,PPP1R12A,PDE8B,PPP2R5E,PPP2R1B,PRKAR1A
Hypoxia Signaling in the Cardiovascular System	0.0165959	15	UBB,UBE2L3,UBE2N,UBE2D2,NOS3,UBE2D1,ATF2,NFKBIA,HSP90AB1,UBE2D3,UBE2E3,UBC,UBE2E1,ATM,UBE2C
Cell Cycle: G1/S Checkpoint Regulation	0.0186209	13	HDAC2,SMAD3,HDAC1,HDAC9,CCND1,SKP1,SKP2,CCND2,TGFB3,GSK3B,CDKN1B,CDK2,ATM
Selenoamino Acid Metabolism	0.0204174	8	CBS,PRMT8,PAPSS1,AHCYL2,MAT2B,MAT2A,GGTLC1,AHCY
PPAR Signaling	0.0218776	18	RELA,GRB2,TNFRSF1A,IL1F6,KRAS,NFKB1,PDGFB,SHC1,TRAF2,NFKBIA,NR0B2,HSP90AB1,NGFR,PDGFRA,MAP2K1,CITED2,SCAND1,PDGFRB
Protein Ubiquitination Pathway	0.0223872	32	UBE2N,UBE2L3,UBE2D2,USO1,UCHL1,HLA-A,UCHL5,UBE2D3,UBE2E3,PSMC2,UBB,UBE4B,USP1,NEDD4,USP33,UBE2D1,SKP1,PSMD8,SKP2,CUL2,PSMD12,PSMD1,USP46,PSMD4,UBC,PSMC3,USP34,USP9Y,USP25,UBE2E1,TCEB1,UBE2C
GABA Receptor Signaling	0.0245471	11	GABBR2,UBB,GAD2,GABRG2,GABRA5,GAD1,GPHN,UBC,GABRA1,GABRA2 (includes EG:2555),AP2S1
GM-CSF Signaling	0.0245471	13	GRB2,PIK3R1,GNB2L1,KRAS,CCND1,SHC1,PPP3CB,PIM1,PPP3R1,AKT3,MAP2K1,PPP3CA,PRKCB1
Citrate Cycle	0.0251189	8	SDHB,SUCLA2,DLD,SDHC,IDH3A,ACLY,MDH1,ATP5G3
Synaptic Long Term Depression	0.0269153	25	PPP2CA,PLA2R1,KRAS,NOS3,WISP2,IGF1,PLCB1,MAP2K1,GUCY1B3,ADCY2,ITPR2,PNPLA3,YWHAZ,C7ORF16,ITPR1,GRN,GNAS,PLCB4,PRKCI,PPP2R3A (includes EG:5523),GNAO1,PPP2R5E,PPP2R1B,GRIA3,PRKCB1
Actin Cytoskeleton Signaling	0.0281838	34	MYH10,MYL6,PIK3R1,ARPC5,PPP1CB,KRAS,IQGAP1 (includes EG:8826),FGF13,SHC1,DIAPH1,PAK1,WASL (includes EG:8976),EZR,FGF12,ARPC4,BAIAP2,MAP2K1,ACTR2,PXN,GRB2,ARPC5L (includes EG:81873),ACTN2,CSK,FGF14,PFN2,WASF1,GSN,ACTG1,PDGFB,ROCK1,PAK3,PPP1R12A,GRLF1,MSN
Death Receptor Signaling	0.0316228	13	TNFRSF21,HSPB3,RELA,MAP2K7,TNFRSF1A,TNFRSF10B,NFKB1,TRAF2,NFKBIA,TNFSF12,CASP2,CFLAR,HSPB1
Mitochondrial Dysfunction	0.0323594	23	COX7B,SDHB,COX10,CPT1B,COX6C,NDUFB5,UQCRB,SDHC,NDUFA13,UQCRH,NDUFA5,NDUFS1,COX11,NDUFV2,NDUFAB1,NDUFB7,UQCRC2,MAPK10,COX5A,NDUFS2,SNCA,NDUFS4,COX15
Wnt/β-catenin Signaling	0.0331131	28	TCF4,PPP2CA,CCND1,NLK,WNT7A,RARB,SMO,CSNK2A1,SFRP5,AKT3,GSK3B,UBB,CSNK1G3,FZD9,TCF7L1,TCF3,ACVR1B,CDH12,FZD4,PPP2R3A (includes EG:5523),GNAO1,TGFB3,CD44,FZD3,PPP2R5E,DVL2,UBC,PPP2R1B
PDGF Signaling	0.0346737	14	GRB2,PIK3R1,TYK2,PLCG1,KRAS,INPPL1,PDGFB,SHC1,SPHK1,PDGFRA,CSNK2A1,MAP2K1,PRKCB1,PDGFRB
Dopamine Receptor Signaling	0.0371535	15	PRKACB,ADCY2,PPP2CA,PPP1CB,PPP1R14B,SLC6A3,PRKAR2B,PPP1R10,PPP1R7,PPP2R3A (includes EG:5523),PPP1R12A,PPP2R5E,PPP2R1B,CALY,PRKAR1A
Regulation of Actin-based Motility by Rho	0.0398107	16	ACTR2,MYL6,ARPC5L (includes EG:81873),ARPC5,PFN2,PPP1CB,WASF1,GSN,ROCK1,PAK1,WIPF1,WASL (includes EG:8976),PAK3,ARPC4,BAIAP2,PPP1R12A
Neurotrophin/TRK Signaling	0.040738	13	MAP2K7,GRB2,BDNF,PIK3R1,PLCG1,KRAS,ATF2,SHC1,NTRK3,NGFR,MAP2K3,RPS6KA1,MAP2K1
Glucocorticoid Receptor Signaling	0.042658	40	PRKACB,RELA,YWHAH,NFATC3,PIK3R1,SMAD3,PBX1,SMARCD2,KRAS,TAF7,NFKB1,SMARCA4,SHC1,POLR2C,NFKBIA,NCOA2,HSP90AB1,PPP3CB,PPP3R1,AKT3,MAP2K1,PPP3CA,MMP1 (includes EG:4312),GTF2H3,MAP2K7,CCNH,GRB2,CHP,GTF2F1,NFATC1,NFATC4,TAF9B,TRAF2,TAF6L,POU2F1,SMARCA2,TGFB3,MAPK10,HLTF,POLR2K
Inositol Phosphate Metabolism	0.0446684	23	PIK3R1,PLCG1,INPPL1,PLK1,GRK5,PLCL2,INPP4A,PAK1,PRKX,PLCB4,INPP4B,NEK2,CDK5,PAK3,SYNJ1,ITPKB,PIM1,ITPKC,PLCB1,MAP2K3,MAP2K1,CDK2,ATM
TGF-β Signaling	0.0457088	15	RUNX3,UBB,GRB2,SMAD3,SMAD6,BMPR2,KRAS,ACVR1B,RUNX2,TGFB3,BMP7,HNF4A,UBC,SMAD1,MAP2K1
IL-6 Signaling	0.0457088	17	HSPB3,RELA,MAP2K7,GRB2,TNFRSF1A,IL1F6,KRAS,NFKB1,SHC1,TRAF2,NFKBIA,NGFR,MAPK10,CSNK2A1,MAP2K3,MAP2K1,HSPB1
JAK/Stat Signaling	0.0467735	12	SHC1,PIAS3,FRAP1,PIAS2,GRB2,PIK3R1,TYK2,PTPN1,PIAS1,AKT3,KRAS,MAP2K1
G- Over-represented pathway categories from IPA analysis of the differentally expressed probes in the Putamen of PD patients compared to controls in the Zhang study
IPA Pathway category	P-value	Number of genes differential expressed in PD	Differentially expressed genes
G-Protein Coupled Receptor Signaling	0.0269153	6	PDE10A,RASGRP1,GNAO1,RGS7,ADORA2B,PRKCB1
H- Over-represented pathway categories from IPA analysis of the differentally expressed probes in the Superior Frontal Gyrus of PD patients compared to controls in the Moran study
IPA Pathway category	P-value	Number of genes differential expressed in PD	Differentially expressed genes
VEGF Signaling	2.39883e-05	11	BCL2L1,MAP2K2,PTK2B,YWHAE,RRAS,FLT1,FOXO3,HRAS,ACTN4,ARNT,PRKCB1
14-3-3-mediated Signaling	7.24436e-05	13	YWHAE,RRAS,FGFR1,MAPT,TYRO3,YWHAZ,HRAS,TUBB4,MAP2K2,YAP1,AKT1S1,PRKCB1,EGFR
Ephrin Receptor Signaling	0.0001	15	FYN,GRIN1,GRIN2A,NGEF,RGS3,CFL1,RRAS,HRAS,RAP1A,GNB1,PAK1,MAP2K2,ARPC4,DOK1,EFNB3
Synaptic Long Term Potentiation	0.00301995	9	GRIN1,GRIN2A,GRM2,CALM3,MAP2K2,RRAS,HRAS,RAP1A,PRKCB1
PTEN Signaling	0.00371535	8	BCL2L1,MAP2K2,RRAS,FOXO3,CDKN1A,CSNK2A1,HRAS,EGFR
Chemokine Signaling	0.00446684	7	CALM3,MAP2K2,PTK2B,CFL1,RRAS,HRAS,PRKCB1
Glycerophospholipid Metabolism	0.00467735	9	PLA2G6,ILDR1,PCYT2,DGKA,YWHAZ,AGPAT1,DGKB,DBT,LYPLA1
Glutamate Receptor Signaling	0.0047863	6	GNB1,GRIN1,GRIN2A,GRM2,GRIK5,CALM3
Synaptic Long Term Depression	0.00616595	10	PLA2G6,ILDR1,GRM2,ADCY2,MAP2K2,RRAS,YWHAZ,HRAS,NPR2,PRKCB1
PI3K/AKT Signaling	0.00616595	9	BCL2L1,MAP2K2,YWHAE,RRAS,FOXO3,CDKN1A,YWHAZ,HRAS,MAPK8IP1
Integrin Signaling	0.0102329	12	FYN,PAK1,TSPAN5,MAP2K2,ARF3,RRAS,ARPC4,HRAS,RHOJ,ACTN4,RAP1A,ITGB3
IGF-1 Signaling	0.011749	7	MAP2K2,YWHAE,RRAS,FOXO3,CSNK2A1,YWHAZ,HRAS
Actin Cytoskeleton Signaling	0.0123027	12	ABI2,PAK1,MAP2K2,CFL1,RRAS,MYH14,ARPC4,FGF14,HRAS,PIP4K2B,ACTN4,SLC9A1
ERK/MAPK Signaling	0.0125893	11	PLA2G6,FYN,PAK1,MAP2K2,PTK2B,RRAS,YWHAZ,HRAS,ELK3,RAP1A,PRKCB1
IL-2 Signaling	0.0141254	5	MAP2K2,PTK2B,RRAS,CSNK2A1,HRAS
α-Adrenergic Signaling	0.0147911	7	GNB1,ADCY2,CALM3,MAP2K2,RRAS,HRAS,PRKCB1
Amyotrophic Lateral Sclerosis Signaling	0.0147911	7	CCS,BCL2L1,GRIN1,PAK1,GRIN2A,GRIK5,BID
Phospholipid Degradation	0.0245471	6	PLA2G6,ILDR1,DGKA,YWHAZ,DGKB,LYPLA1
JAK/Stat Signaling	0.0251189	5	PIAS2,MAP2K2,RRAS,CDKN1A,HRAS
GM-CSF Signaling	0.0269153	5	BCL2L1,MAP2K2,RRAS,HRAS,PRKCB1
Natural Killer Cell Signaling	0.0288403	7	FYN,PAK1,MAP2K2,KLRD1,RRAS,HRAS,PRKCB1
Neuregulin Signaling	0.0371535	6	MAP2K2,RRAS,DCN,HRAS,EGFR,PRKCB1
Apoptosis Signaling	0.0371535	6	BCL2L1,MAP2K2,RRAS,BID,HRAS,SPTAN1
PDGF Signaling	0.0457088	5	MAP2K2,RRAS,CSNK2A1,HRAS,PRKCB1
I- Over-represented pathway categories from IPA analysis of the differentally expressed probes in the Occipital Cortex of PD patients compared to controls in the Vogt study
IPA Pathway category	P-value	Number of genes differential expressed in PD	Differentially expressed genes
Propanoate Metabolism	0.000151356	16	ALDH4A1,ACSL3,ABAT,ECH1,MUT,LDHB,ALDH9A1,ALDH2,HIBCH,ALDH1A1,DHCR24,SUCLG1,IVD,SDS,ALDH5A1,ALDH7A1
RAR Activation	0.00030903	32	PRKACB,PIK3R1,PDPK1,MAPK13,MAP3K5,RARG,RBP1,PRKCZ,SMARCA4,ALDH1A1,TGFB1,PIK3CG,GTF2H5,RXRB,SMAD1,ZBTB16,MAP2K1,PRKCA,ADCY2,MED1,RDH11,SNW1,PRKCI,SMARCA2,IGFBP3,NCOA1,PRKCH,NRIP1,PML,HLTF,PPARGC1A,PRKAR1A
IGF-1 Signaling	0.000537032	19	PRKACB,RPS6KB1,PIK3C2A,PIK3R1,PDPK1,KRAS,IGFBP5,PRKCZ,YWHAQ (includes EG:10971),PTK2,PRKCI,PIK3CG,SOS1,IGFBP3,IGF1R,PRKCH,IRS2,MAP2K1,PRKAR1A
Protein Ubiquitination Pathway	0.00074131	33	USP12,USP14,UBR2,UBE3B,USP11,FBXW7,ANAPC10,USP8,UBE2B,USP13,USP16,UBE2V1,USP47,USP10,PSMC2,UBB,UBE4B,USP9X,PSMD5,USP33,UBE3A,SKP1,XIAP,UBE2G2,PSMD11,USP4,PSMD12,ANAPC5,USP46,USP34,UBE2E1,TCEB1,ANAPC1
Butanoate Metabolism	0.000933254	14	ALDH4A1,BDH2,PPME1,NLGN1,ABAT,ECH1,SDHC,ALDH9A1,ALDH2,ALDH1A1,HMGCS1,SDS,ALDH5A1,ALDH7A1
NRF2-mediated Oxidative Stress Response	0.00134896	30	AKR7A2,USP14,PIK3R1,ACTA2 (includes EG:59),GCLC,KRAS,MAP3K5,PRKCZ,MAFG,CUL3,GSTT1,PIK3CG,DNAJA3,FOSL1,FMO1,ACTG2 (includes EG:72),MAP2K1,CBR1,PRKCA,UBB,PIK3C2A,GSTM3 (includes EG:2947),DNAJB14,PRKCI,GPX2,CAT,PRKCH,DNAJB6,MAP2K5,MGST3
G-Protein Coupled Receptor Signaling	0.00158489	32	PRKACB,ADRA2B,FYN,ADRBK1,DUSP6,PIK3R1,PDPK1,HTR1D,KRAS,RGS12,PDE4D,PIK3CG,CREB1,SOS1,RGS14,MAP2K1,PRKCA,HTR2A,HTR1E,ADCY2,HRH2,EDNRB,PIK3C2A,GNAQ,PDE4B,RASGRP1,GNAO1,EDNRA,ADORA2A,AGTR1,PRKAR1A,CAMK2G
cAMP-mediated Signaling	0.00177828	27	ADRA2B,PRKACB,CREM,ADRBK1,DUSP6,HTR1D,RGS12,PDE4D,PPP3CB,CREB1,RGS14,PKIA,MAP2K1,PPP3CA,CALM1,HTR1E,ADCY2,HRH2,PDE4B,AKAP2,AKAP4,GNAO1,ADORA2A,AGTR1,AKAP1,PRKAR1A,CAMK2G
Fc Epsilon RI Signaling	0.00457088	18	FYN,PIK3C2A,PIK3R1,PLA2G1B,PDPK1,KRAS,PLA2G2A,MAPK13,PRKCZ,PLA2G4C (includes EG:8605),PRKCI,SYK,PIK3CG,SOS1,MS4A2,PRKCH,MAP2K1,PRKCA
Xenobiotic Metabolism Signaling	0.00501187	37	ALDH4A1,PIK3R1,PPP2R5B,ALDH1L1,GCLC,KRAS,MAPK13,MAP3K5,CES2 (includes EG:8824),PRKCZ,ARNT,CUL3,GSTT1,ALDH1A1,PIK3CG,FMO1,MAP2K1,ALDH5A1,ALDH7A1,PRKCA,FMO3,PIK3C2A,MED1,GSTM3 (includes EG:2947),ALDH9A1,SULT1A3,PRKCI,CAT,NCOA1,PRKCH,NRIP1,ABCC3,MAP2K5,SULT1B1,MGST3,PPARGC1A,CAMK2G
VEGF Signaling	0.0060256	16	EIF1AY,PIK3C2A,ACTN2,PIK3R1,ACTA2 (includes EG:59),KRAS,PGF,ARNT,PTK2,BCL2L1,EIF1AX,PIK3CG,SOS1,ACTG2 (includes EG:72),MAP2K1,PRKCA
ERK/MAPK Signaling	0.00676083	28	PRKACB,FYN,DUSP6,PIK3R1,PPP2R5B,KRAS,PLA2G2A,EIF4EBP1,YWHAQ (includes EG:10971),PTK2,ELF4,PIK3CG,SOS1,CREB1,MAP2K1,PRKCA,PAK2,PIK3C2A,CRKL,PLA2G1B,ITGA5,PLA2G4C (includes EG:8605),H3F3A,TLN2,PRKCI,HSPB7,RPS6KA5 (includes EG:9252),PRKAR1A
Valine, Leucine and Isoleucine Degradation	0.00707946	13	ALDH4A1,ABAT,ECH1,MUT,ALDH9A1,ALDH2,HIBCH,ALDH1A1,IVD,SDS,HMGCS1,ALDH5A1,ALDH7A1
Ascorbate and Aldarate Metabolism	0.00776247	6	ALDH4A1,ALDH2,ALDH1A1,ALDH5A1,ALDH9A1,ALDH7A1
Insulin Receptor Signaling	0.00794328	21	PRKACB,TSC1,RPS6KB1,FYN,SOCS3,PIK3C2A,TRIP10,PIK3R1,CRKL,PDPK1,KRAS,PRKCZ,PTPRF,EIF4EBP1,PRKCI,PIK3CG,SOS1,PRKCH,IRS2,MAP2K1,PRKAR1A
Lysine Degradation	0.00933254	13	ALDH4A1,PLOD2,AASDHPPT,ECH1,ALDH9A1,ALDH2,ALDH1A1,DLST,TPP1,SDS,ALDH5A1,KYNU,ALDH7A1
Pyruvate Metabolism	0.0102329	14	AKR7A2,ALDH4A1,ACSL3,PC,ME3,ME1,LDHB,ALDH9A1,ALDH2,ALDH1A1,DLAT,ME2,ALDH5A1,ALDH7A1
β-alanine Metabolism	0.0107152	11	ALDH4A1,HIBCH,ALDH2,ALDH1A1,ABAT,ECH1,IVD,SDS,ALDH5A1,ALDH9A1,ALDH7A1
Erythropoietin Signaling	0.0120226	13	RPS6KB1,SOCS3,PIK3C2A,PIK3R1,PDPK1,KRAS,PRKCZ,PRKCI,PIK3CG,SOS1,PRKCH,MAP2K1,PRKCA
Calcium Signaling	0.0154882	26	PRKACB,ATP2B1,ACTA2 (includes EG:59),MYH11,HDAC6,PPP3CB,RYR3,CREB1,ACTG2 (includes EG:72),ASPH,CHRNA3,PPP3CA,CALM1,ATP2C1,RYR2,GRIA2,TPM2,ATP2A3,ATP2B2,MYL9 (includes EG:10398),CHRNA2,ATP2B4,CAMKK2,PRKAR1A,CAMK2G,RAP2A
Neurotrophin/TRK Signaling	0.0177828	12	NTRK2,PIK3C2A,SPRY2,PIK3CG,PIK3R1,SOS1,CREB1,PDPK1,KRAS,MAP3K5,MAP2K1,MAP2K5
Histidine Metabolism	0.0213796	9	ALDH4A1,ALDH2,HNMT,ALDH1A1,FTSJ1,ALDH1L1,ALDH5A1,ALDH9A1,ALDH7A1
Citrate Cycle	0.0229087	7	CS,PC,SUCLG1,ACO2,DLST,SDHC,ATP5G3
Aryl Hydrocarbon Receptor Signaling	0.0251189	21	TP53,ALDH4A1,MED1,GSTM3 (includes EG:2947),ALDH1L1,RARG,ALDH9A1,SMARCA4,ARNT,GSTT1,ALDH1A1,NR0B2,TGFB1,HSPB7,NFIB,NRIP1,RXRB,ESR2,MGST3,ALDH5A1,ALDH7A1
Amyotrophic Lateral Sclerosis Signaling	0.0275423	15	CAPN5,TP53,PIK3C2A,PIK3R1,GRIA2,CACNA1C,XIAP,PGF,BCL2L1,HECW1,PIK3CG,CAT,CASP1,SLC1A2,PPP3CA
Estrogen Receptor Signaling	0.0301995	18	TAF9,MED1,KRAS,RBM9,POLR2B,NR3C1,SMARCA4,SPEN,H3F3A,NR0B2,SOS1,NCOA1,GTF2H5,NRIP1,G6PC2,MAP2K1,ESR2,PPARGC1A
Neuregulin Signaling	0.0389045	14	RPS6KB1,PIK3R1,CRKL,DCN,PDPK1,ITGA5,KRAS,PRKCZ,PRKCI,ERBB4,SOS1,PRKCH,MAP2K1,PRKCA
Glycolysis/Gluconeogenesis	0.0389045	15	ALDH4A1,ACSL3,PGM3,PGM1,ALDH1L1,LDHB,ALDH9A1,BPGM,PFKM,ALDH2,ALDH1A1,DLAT,ALDH5A1,ALDH7A1,ALDOC
Glycerolipid Metabolism	0.042658	15	AKR7A2,ALDH4A1,PNLIPRP1,AGPAT1,DAGLA,ALDH9A1,ALDH2,AGPAT5,PPAP2A,ALDH1A1,SPHK2,AGPAT2,PPAP2B,ALDH5A1,ALDH7A1
Axonal Guidance Signaling	0.0436516	45	PRKACB,FYN,SLIT1,PIK3R1,SEMA4F,KRAS,PDGFC,PRKCZ,PGF,GNB1,PTK2,EFNB2,PPP3CB,SDC2,PIK3CG,WNT7B,SOS1,BAIAP2,ADAM19 (includes EG:8728),WNT4,MAP2K1,PPP3CA,PRKCA,PAK2,PIK3C2A,ADAM2,SHANK2,ARHGEF15,CRKL,PTCH1,GNAQ,ITGA5,EPHA3,MYL9 (includes EG:10398),NTRK2,PRKCI,GNAO1,FZD3,RTN4,PRKCH,BMP7,BMP6,PRKAR1A,NTN2L,FZD7
Synaptic Long Term Potentiation	0.0457088	16	PRKACB,GNAQ,GRIA2,CACNA1C,KRAS,PRKCZ,PRKCI,PPP3CB,CREB1,PRKCH,MAP2K1,PPP3CA,CAMK2G,PRKAR1A,PRKCA,CALM1
FGF Signaling	0.0457088	13	PIK3C2A,PIK3R1,CRKL,FGF9,MAP3K5,MAPK13,FGF18,PIK3CG,SOS1,CREB1,RPS6KA5 (includes EG:9252),MAP2K1,PRKCA
J- Over-represented pathway categories from IPA analysis of the differentally expressed probes in the Putamen of PD patients compared to controls in the Vogt study
IPA Pathway category	P-value	Number of genes differential expressed in PD	Differentially expressed genes
Pyrimidine Metabolism	0.00691831	5	POLR1C,ENTPD1,CAD,POLM,NT5C2
Calcium Signaling	0.0128825	5	MEF2C,TRPC6,SLC8A1,ATP2B4,GRIA3
Purine Metabolism	0.0281838	6	POLR1C,ENTPD1,PDE4B,MPP2,POLM,NT5C2
Serotonin Receptor Signaling	0.0295121	2	HTR7,HTR2A
BMP signaling pathway	0.0457088	3	FST,PDGFRA,FGFR2
K- Over-represented pathway categories from IPA analysis of the differentally expressed probes in the Cerebellum of PD patients compared to controls in the Vogt study
IPA Pathway category	P-value	Number of genes differential expressed in PD	Differentially expressed genes
SAPK/JNK Signaling	0.00691831	4	MINK1,DUSP4,GNA13,TRA@
N-Glycan Degradation	0.0204174	2	GM2A,FLJ21865
L- Over-represented pathway categories from IPA analysis of the differentally expressed probes in the Whole Blood of PD patients compared to controls in the Scherzer study
IPA Pathway category	P-value	Number of genes differential expressed in PD	Differentially expressed genes
Inositol Phosphate Metabolism	0.0177828	5	PRKX,PRPF4B,CSNK1A1,IHPK1,PIP4K2A
VEGF Signaling	0.0494436	3	EIF1AX,EIF1,BCL2
M- Over-represented pathway categories from IPA analysis of the differentally expressed probes in LCM SN dopaminergic neurons of PD patients compared to controls in the Castelvetri study
no significant pathways at 0.05
